# 1 **A complex of BRCA2 and PP2A-B56 is required for DNA repair by**

## 2 **homologous recombination**

3 Sara Marie Ambjoern<sup>1,2</sup>, Julien P. Duxin<sup>1</sup>, Emil PT Hertz<sup>1</sup>, Isha Nasa<sup>3</sup>, Joana Duro<sup>1</sup>, Thomas  
4 Kruse<sup>1</sup>, Blanca Lopez Mendez<sup>1</sup>, Beata Rymarczyk<sup>4</sup>, Lauren E. Cressey<sup>3</sup>, Thomas van  
5 Overeem Hansen<sup>5</sup>, Arminja Kettenbach<sup>3</sup>, Vibe H. Oestergaard<sup>2\*</sup>, Michael Lisby<sup>2,6\*</sup>, Jakob  
6 Nilsson<sup>1\*</sup>

7 <sup>1</sup> The Novo Nordisk Foundation Center for Protein Research, Faculty of Health and Medical  
8 Sciences, University of Copenhagen, Denmark.

9 <sup>2</sup> Department of Biology, University of Copenhagen, 2200 Copenhagen N, Denmark.

10 <sup>3</sup> Biochemistry and Cell Biology, Geisel School of Medicine at Dartmouth College,  
11 Dartmouth, United States of America.

12 <sup>4</sup> Department of Biology, University of Konstanz, 78457 Konstanz, Germany.

13 <sup>5</sup> Department of Clinical Genetics, Copenhagen University Hospital, Rigshospitalet, 2100  
14 Copenhagen, Denmark.

15 <sup>6</sup> Center for Chromosome Stability, Department of Cellular and Molecular  
16 Medicine, University of Copenhagen, DK-2200 Copenhagen N, Denmark.

17 \*Correspondence to

18 Jakob Nilsson: [jakob.nilsson@cpr.ku.dk](mailto:jakob.nilsson@cpr.ku.dk)

19 Michael Lisby: [mlisby@bio.ku.dk](mailto:mlisby@bio.ku.dk)

20 Vibe H. Oestergaard: [vibe@bio.ku.dk](mailto:vibe@bio.ku.dk)

## 21 **Abstract**

22 Mutations in the tumour suppressor gene BRCA2 are associated with predisposition to breast  
23 and ovarian cancers. BRCA2 has a central role in maintaining genome integrity by facilitating  
24 the repair of toxic DNA double-strand breaks (DSBs) by homologous recombination (HR).  
25 BRCA2 acts by promoting RAD51 nucleoprotein filament formation on resected single-  
26 stranded DNA, but how BRCA2 activity is regulated during HR is not fully understood. Here,  
27 we delineate a pathway where ATM and ATR kinases phosphorylate a highly conserved  
28 region in BRCA2 in response to DSBs. These phosphorylations stimulate the binding of the  
29 protein phosphatase PP2A-B56 to BRCA2 through a conserved binding motif. We show that  
30 the phosphorylation-dependent formation of the BRCA2-PP2A-B56 complex is required for  
31 efficient RAD51 loading to sites of DNA damage and HR-mediated DNA repair. Moreover, we  
32 find that several cancer-associated mutations in BRCA2 deregulate the BRCA2-PP2A-B56  
33 interaction and sensitize cells to PARP inhibition. Collectively, our work uncovers PP2A-B56  
34 as a positive regulator of BRCA2 function in HR with clinical implications for BRCA2 and  
35 PP2A-B56 mutated cancers.

## 36 **Main text**

37 Homologous recombination (HR) is an essential cellular process that repairs severe DNA  
38 lesions such as DNA double-strand breaks (DSBs) to ensure genome integrity<sup>1</sup>. Women  
39 inheriting monoallelic deleterious mutations in the central HR components BRCA1 and BRCA2  
40 are highly predisposed to breast and ovarian cancers<sup>2,3</sup>. HR-mediated repair takes place  
41 during S and G2 phases of the cell cycle and uses a homologous DNA sequence, most often  
42 the sister chromatid, as a template to repair DSBs in a high-fidelity manner<sup>1</sup>.

43 BRCA2 plays a central role in HR by facilitating the formation of RAD51 nucleoprotein  
44 filaments on resected RPA-coated single-stranded DNA ends, which can then search for and  
45 invade a homologous repair template<sup>4-6</sup>. BRCA2 binds monomeric RAD51 through eight  
46 central BRC repeats<sup>7-9</sup> and binds and stabilizes RAD51 filaments through a C-terminal  
47 domain<sup>10,11</sup>. An N-terminal PALB2 interaction domain recruits BRCA2 to sites of DNA damage  
48 as part of the BRCA1-PALB2-BRCA2 complex<sup>12</sup>.

49 HR is a highly regulated process yet many aspects of this regulation are not fully  
50 understood<sup>13</sup>. Phosphorylation of BRCA2 and other HR components by DNA damage kinases  
51 (ATM/ATR) and cyclin-dependent kinases has been shown to play a role<sup>1,13-15</sup>. In contrast, a  
52 direct role of protein phosphatases in HR is less clear in part due to a lack of understanding  
53 of how protein phosphatases recognize their substrates<sup>16-18</sup>. Recent discoveries of consensus  
54 binding motifs for protein phosphatases<sup>19-21</sup> now allows for precise dissection of their roles in  
55 DNA repair processes.

56

### 57 **BRCA2 binds PP2A-B56 through a conserved LxxIxE motif and recruits it to DSBs**

58 We previously identified a putative binding site for the serine/threonine protein phosphatase  
59 PP2A-B56 in BRCA2, which is of unknown significance<sup>20</sup>. PP2A-B56 is a trimeric complex  
60 consisting of a scaffolding subunit (PPP2R1A-B), a catalytic subunit (PPP2CA-B), and a  
61 regulatory subunit of the B56 family (isoforms  $\alpha$ ,  $\beta$ ,  $\gamma$ ,  $\delta$ , and  $\epsilon$ ). PP2A-B56 achieves specificity  
62 by binding to LxxIxE motifs in substrates or substrate-specifiers through a conserved binding

63 pocket present in all isoforms of B56<sup>20,22</sup> (Fig. 1A-B). The LxxIxE motif in BRCA2 is embedded  
64 in a hitherto uncharacterized region between BRC repeat 1 and 2 spanning residues 1102-  
65 1132, which is highly conserved spanning more than 450 million years of evolution (190 full  
66 length vertebrate BRCA2 protein sequences analyzed by Clustal Omega multiple sequence  
67 alignment) (Fig.1B and Table S1). To further explore this binding site, we first validated the  
68 interaction in human cells, focusing on the main nuclear isoform of B56, B56 $\gamma$ <sup>23</sup>. In HeLa cells,  
69 Myc-tagged fragments of BRCA2 spanning BRC repeat 1 and 2 (Myc-BRCA2<sup>1001-1255</sup>) co-  
70 purified with Venus-B56 $\gamma$  (Fig. 1C), and reciprocally, all components of the trimeric PP2A-B56  
71 complex co-purified with Venus-BRCA2<sup>1001-1255</sup> (Fig. S1A, Table S2). Additionally, BRCA2 co-  
72 purified with both B56 $\alpha$  and B56 $\gamma$  in *Xenopus* egg extracts (Fig. 1D), consistent with an  
73 evolutionarily conserved interaction. Mutation of two of the central residues of the LxxIxE motif,  
74 L1114 and I1117, to alanines (referred to as the 2A mutant, Fig. 1B) abrogated the interaction  
75 to Venus-B56 $\gamma$  (Fig. 1C), showing that the interaction depends on the LxxIxE motif. The direct  
76 and LxxIxE motif-dependent interaction between BRCA2 and B56 was confirmed *in vitro* by  
77 isothermal titration calorimetry (ITC) (Fig. 1E, Fig. S1B) and gel filtration chromatography (Fig  
78 S1C). The  $K_D$  is low micromolar, which might explain why the interaction has not been reported  
79 previously. Consistent with our binding data, we detected BRCA2 and the BRCA1-PALB2-  
80 BRCA2 complex partner BRCA1 in proximity to B56 $\gamma$  in camptothecin (CPT) treated HeLa  
81 cells using a biotin proximity labelling approach with TurboID<sup>24</sup>-tagged B56 $\gamma$  coupled to mass  
82 spectrometry (Fig. S1D, Table S2).

83 To determine if BRCA2 could recruit PP2A-B56 to DSBs, we exploited the *Xenopus*  
84 egg extract system that allows direct monitoring of proteins binding to DSBs. Either closed  
85 circular or linearized DSB-containing plasmids were added to *Xenopus* egg extracts, and  
86 proteins co-purifying with the DNA were analyzed by Western blotting following plasmid  
87 pulldown. We found that B56 $\gamma$  was enriched on DSB-containing plasmid DNA, and that  
88 immuno-depletion of BRCA2 from the extracts diminished the recruitment of B56 $\gamma$  to the same



89 damaged plasmid (Fig. 1F). Taken together, our results show that BRCA2 binds PP2A-B56  
90 through a highly conserved LxxIxE motif and recruits it to DSBs.

91

## 92 **PP2A-B56 binding is required for BRCA2 function in DNA repair by HR**

93 We next asked whether the interaction between BRCA2 and PP2A-B56 is required for the  
94 function of BRCA2 in DNA repair. To address this, we constructed an RNAi knockdown and  
95 complementation set-up in HeLa DR-GFP Flp-In cells<sup>25</sup> and U2OS Flp-In T-REx cells. This  
96 setup allowed transient depletion of endogenous BRCA2 using siRNA-mediated knockdown  
97 and complementation with stably expressed siRNA-resistant cDNA constructs of mCherry- or  
98 Venus-MBP-tagged full-length BRCA2 WT or 2A (referred to as BRCA2 WT and 2A). Efficient  
99 depletion of endogenous BRCA2 and similar expression levels and chromatin association of  
100 the complementation constructs were confirmed by immunoblotting (Fig. S2A-C). We then  
101 utilized the DR-GFP reporter assay<sup>26</sup> (Fig. 2A, left) to assess HR-mediated DSB repair.  
102 Strikingly, complementation with BRCA2 WT but not 2A suppressed the loss of HR-mediated  
103 repair resulting from BRCA2 depletion (Fig. 2A, right), suggesting that PP2A-B56 binding is  
104 required for the function of BRCA2 in HR. Consistent with this result, we found that expression  
105 of a genetically encoded inhibitor of PP2A-B56 binding to LxxIxE motifs similarly diminished  
106 HR-mediated repair in the DR-GFP reporter assay<sup>26,27</sup> (Fig. S2D).

107 BRCA2 is considered essential in most contexts at least in part due to its function in  
108 HR and its deletion or depletion leads to lethality<sup>28-32</sup>. To assess the importance of the BRCA2-  
109 B56 interaction for cell viability, we performed colony formation assays and determined plating  
110 efficiencies for BRCA2 WT and 2A complemented U2OS cells (Fig. 2B). Consistent with the  
111 results for HR-mediated repair, expression of BRCA2 WT but not 2A suppressed the  
112 diminished viability resulting from BRCA2 depletion (Fig. 2B).

113 Due to impaired DNA repair, loss of BRCA2 function causes hypersensitivity to various  
114 DNA damaging agents including DNA interstrand crosslinking (ICL) agents<sup>33</sup>, topoisomerase  
115 I inhibitors<sup>34</sup>, and Poly-(ADP-ribose) polymerase (PARP) inhibitors<sup>35,36</sup>, which is exploited  
116 therapeutically<sup>37</sup>. Accordingly, BRCA2 depletion resulted in hypersensitivity to Mitomycin C

117 (MMC), CPT, and Olaparib (Fig. 2C-E). Consistent with a role for the BRCA2-PP2A-B56  
118 complex in DNA repair, BRCA2 2A expressing cells were significantly more sensitive to these  
119 DNA damaging agents than BRCA2 WT expressing cells (Fig. 2C-E).

120 To investigate the mechanistic basis for the impaired DNA repair in BRCA2 mutant  
121 cells, we looked at MMC-induced nuclear RAD51 repair foci in S-phase by  
122 immunofluorescence microscopy. BRCA2 depletion abolished the ability to form RAD51 foci  
123 (Fig. 2F, Fig. S2E), consistent with the central role of BRCA2 in loading RAD51 to sites of  
124 DNA damage<sup>33,38</sup>. Expression of BRCA2 WT but to a lesser extent 2A rescued loss of RAD51  
125 foci resulting from BRCA2 depletion (Fig. 2F). The impairment in RAD51 focus formation  
126 observed in the 2A expressing cell line did not arise from significant changes in BRCA2-  
127 RAD51 interaction, as similar amounts of RAD51 co-purified with BRCA2 WT and 2A in  
128 immunoprecipitation assays (Fig. 2G).

129 Similar results were obtained when we deleted the entire conserved region, which  
130 contains the LxxIxE motif (BRCA2  $\Delta$ 1100-1131). This also caused a significant decrease in  
131 cell viability, DNA damage tolerance, and RAD51 foci formation (Fig. S3A-E), in line with the  
132 results of the 2A mutation. We conclude that the interaction to PP2A-B56 is central to the  
133 function of BRCA2 in HR-mediated DNA repair.

134

### 135 **BRCA2-PP2A-B56 complex formation is stimulated by ATM/ATR-mediated** 136 **phosphorylation**

137 In several instances, PP2A-B56 interacts with substrate specifiers in a manner regulated by  
138 phosphorylation of neighboring sites flanking the LxxIxE motif to allow cross-talk between  
139 kinases and phosphatases<sup>20</sup>. The LxxIxE motif of BRCA2 is surrounded by three fully  
140 conserved SQ/TQ sites (Fig. 3A, Fig. 1B, Table S1), which are putative consensus  
141 phosphorylation sites for the DNA damage response kinases<sup>14</sup>. To validate these  
142 phosphorylation sites, we raised phospho-specific antibodies against the first and the last  
143 phosphorylation site, S1106 and T1128 (Fig. 3A, Fig. S4A-B for antibody validation). For the  
144 pS1106 phosphorylation site, the epitope included phosphorylation of T1104 which is a

145 putative CDK site. We found that both pT1104/pS1106 and pT1128 phosphorylation are  
146 stimulated by CPT-induced DNA damage in S-phase (Fig. 3B). Inhibition of ATM and to a  
147 lesser extent ATR kinase reduced the phosphorylation, while inhibition of both fully abrogated  
148 it (Fig. 3B, Fig. S4C). To dissect the kinetics of BRCA2 phosphorylation in a more synchronous  
149 model system, we turned to *Xenopus* egg extracts, taking advantage of the evolutionary  
150 conservation of the region surrounding T1128 (*X. laevis* T1196) (Fig. 3A), which allowed us to  
151 use the antibody raised against human BRCA2 pT1128. In this system, addition of a linearized  
152 DSB-containing plasmid, but not an intact one, resulted in rapid ATM-dependent T1196  
153 phosphorylation (Fig. S4D-E), which could also be detected on resected linearized DNA (Fig.  
154 S4F). Likewise, during the replication-coupled repair of a cisplatin ICL containing plasmid<sup>39</sup>,  
155 T1196 was also phosphorylated at the time of DSB formation (Fig. 3C). Collectively, these  
156 results demonstrate that the SQ/TQ sites in BRCA2 flanking the LxxIxE motif are  
157 phosphorylated rapidly by ATM/ATR in response to DSBs.

158         Next, to directly assess whether phosphorylation of these sites affects the binding to  
159 PP2A-B56, we measured the binding affinity between B56 and various phosphorylated  
160 BRCA2 peptides by ITC (Fig. 3D, Fig. S5). Phosphorylation of S1123 and S1128 increased  
161 the binding affinity four- and two-fold, respectively, while the double phosphorylated peptide  
162 (S1123/S1128) had an eight-fold increase in binding affinity (Fig. 3D). In contrast,  
163 phosphorylation of S1106 slightly weakened the interaction (Fig. 3D).

164         To investigate how the phosphorylation status of BRCA2 affects PP2A-B56 binding in  
165 cells, we constructed mutants of BRCA2 with all SQ/TQ sites mutated to AQ or DQ (referred  
166 to as BRCA2 3AQ and 3DQ), constituting unphosphorylated and phosphorylation-mimetic  
167 versions of the protein, respectively (Fig. 3A). We observed that Myc-BRCA2<sup>1001-1255</sup> 3AQ co-  
168 purified less with Venus-B56 $\gamma$  than Myc-BRCA2<sup>1001-1255</sup> WT, whereas Myc-BRCA2<sup>1001-1255</sup> 3DQ  
169 co-purified more with Venus-B56 $\gamma$  in immunoprecipitation assays (Fig. 3E), consistent with a  
170 two-fold increase in binding affinity of a 3DQ peptide measured by ITC (Fig. 3D). Our results  
171 argue that collectively these phosphorylations stimulate the binding to PP2A-B56 in cells.

172           Next, to address whether these phosphorylation sites are important for the function of  
173 BRCA2, we investigated the viability, DNA damage tolerance and RAD51 focus formation of  
174 cells expressing BRCA2 3AQ and 3DQ in our RNAi and complementation system in U2OS  
175 cells (Fig. S2B-C, Fig. 3F-J). Expression of both BRCA2 3AQ and 3DQ resulted in decreased  
176 viability and MMC hypersensitivity compared to BRCA2 WT (Fig. 3F-G). Surprisingly, while  
177 expression of BRCA2 3AQ led to CPT and Olaparib hypersensitivity and a reduction in RAD51  
178 foci, BRCA2 3DQ was indistinguishable from BRCA2 WT in these assays, suggesting that  
179 mimicking phosphorylation is sufficient to sustain some aspects of functionality (Fig. 3H-J).  
180 Collectively, these results show that conserved ATM/ATR phosphorylation sites flanking the  
181 LxxIxE motif control the interaction to PP2A-B56 and are required for BRCA2 function.

182

183 **BRCA2 cancer mutations deregulate the interaction to PP2A-B56 and sensitize cells to**  
184 **PARP inhibition.**

185 We next asked whether our findings would be clinically relevant to BRCA2 mutation carriers.  
186 Several BRCA2 missense variants of uncertain clinical significance, which are reported in  
187 individuals with a hereditary cancer predisposition, localize to the highly conserved B56-  
188 interacting region (ClinVar database, NIH). We selected three of them c.3318C>G (S1106R),  
189 c.3346A>C (T1116P), and c.3383C>T (T1128I), which localize to the B56-regulating  
190 phosphorylation sites or the LxxIxE motif itself (Fig. 4A). Notably, BRCA2 S1106R was  
191 recently suggested to be likely benign using a multifactorial likelihood quantitative analysis<sup>40</sup>.  
192 We first determined whether these mutations interfere with PP2A-B56 binding. We observed  
193 that Myc-BRCA2<sup>1001-1255</sup> S1106R and T1116P co-purified more with Venus-B56 $\gamma$  than Myc-  
194 BRCA2<sup>1001-1255</sup> WT, whereas Myc-BRCA2<sup>1001-1255</sup> T1128I co-purified less with Venus-B56 $\gamma$  in  
195 immunoprecipitations assays (Fig. 4B). The increased binding of the S1106R mutant was  
196 reflected in a two-fold increase in binding affinity as determined by ITC measurements,  
197 whereas BRCA2 T1116P and T1128I had  $K_D$  values similar to BRCA2 WT (Fig. S6A-B). The  
198 stimulatory effect of S1106R likely arise from the generation of a positively charged motif

199 upstream of the LxxlxE motif (Fig. 4A) that strengthen binding of PP2A-B56<sup>41</sup>. T1116P  
200 generates a putative proline-directed phosphorylation site at position two of the LxxlxE motif  
201 (Fig. 4A), which is known to stimulate interaction to PP2A-B56 when phosphorylated<sup>20</sup>. Finally,  
202 T1128I likely prevents the stimulatory effect of T1128 phosphorylation.

203 To address whether these cancer mutations impact on the function of BRCA2, we  
204 investigated the cell viability and DNA damage tolerance of cells expressing BRCA2 S1106R,  
205 T1116P, and T1128I in our RNAi and complementation system in U2OS cells (Fig. S6C).  
206 Expression of BRCA2 S1106R and T1128I resulted in diminished viability compared to  
207 expression of BRCA2 WT, and expression of all mutants led to a mild sensitivity to the clinically  
208 relevant PARP inhibitor Olaparib (Fig. 4C-D). Collectively, these results suggest that BRCA2  
209 cancer mutations located in the B56-interacting region can deregulate the interaction to PP2A-  
210 B56 and sensitize cells to PARP inhibition.

211

212

213 Here, we provide to our knowledge the first example of a protein phosphatase regulating HR  
214 by directly binding to an HR component through a specific substrate recognition motif. We  
215 propose a model (Fig. 4E) in which ATM/ATR-mediated phosphorylation of BRCA2 in  
216 response to DSBs stimulates the recruitment of PP2A-B56 to BRCA2 at the site of the lesion  
217 via a conserved LxxlxE motif. The complex of BRCA2 and PP2A-B56 is required for efficient  
218 RAD51 loading and HR-mediated repair. This mechanism elegantly enables crosstalk  
219 between the DNA damage response and BRCA2-PP2A-B56 complex formation, possibly to  
220 ensure proper spatiotemporal formation of the complex.

221 A major question arising from our findings is what the functional substrate(s) of  
222 BRCA2-bound PP2A-B56 are at the site of the DNA lesion. Our results clearly illustrate that  
223 PP2A-B56 does not act as a mere off switch for DNA damage response signaling once repair  
224 is completed. Rather, the observation that the PP2A-B56 non-binding mutant is deficient in  
225 RAD51 focus formation and HR-mediated DSB repair demonstrates that PP2A-B56 plays an  
226 active role during HR. BRCA2-bound PP2A-B56 may act to dephosphorylate protein

227 substrates to positively moderate their functions in HR. It is also possible that BRCA2-bound  
228 PP2A-B56 is required for dynamic phosphorylation/dephosphorylation cycles of protein  
229 substrates at the site of the DNA lesion to drive repair. We anticipate that PP2A-B56 have  
230 multiple substrates controlling RAD51 nucleoprotein filament formation and possibly also  
231 substrates controlling BRCA2 functions in other processes such as fork protection and cohesin  
232 dynamics<sup>42-44</sup>. Interestingly, during mitosis, PP2A-B56 appears to regulate BRCA2 function  
233 through an alternative recruitment mechanism<sup>45</sup>, suggesting that PP2A-B56 might be a  
234 general regulator of BRCA2 functionality throughout the cell cycle.

235         Importantly, our discovery raises the possibility that mutations in PP2A-B56  
236 components, which are common in human cancers<sup>46</sup>, result in HR deficiencies that may be  
237 targeted therapeutically<sup>37</sup>

238

## 239 **Acknowledgements**

240 Work at the Novo Nordisk Foundation Center for Protein Research is supported by grant  
241 NNF14CC0001 and JN1 is supported by grants from the Danish Cancer Society (R167-  
242 A10951-17-S2), Independent Research Fund Denmark (8021-00101B) and Novo Nordisk  
243 Foundation (NNF18OC0053124 and NNF20OC0065098). This work was furthermore  
244 supported by the Danish Cancer Society (R146-A9454-16-S2) to S.M.A. and M.L. and the  
245 Villum Foundation to V.H.O. and M.L., the Danish National Research Foundation (DNRF115)  
246 to M.L., Dansk Kræftforskningsfond to S.M.A., and by the R35GM119455 grant from the  
247 National Institute of General Medicine to A.K. We thank the CPR protein production facility  
248 for helping to produce and purify recombinant B56 protein and the DanStem Flow Cytometry  
249 and Sequencing (FlowCytSeq) platform for technical assistance with flow cytometry. We  
250 would also like to thank Helen Piwnica-Worms, Stephen Taylor, and Jeffrey Parvin for the kind  
251 gifts of the U2OS Flp-In T-REx, HeLa Flp-In-T-Rex, and HeLa DR-GFP Flp-In cell lines,  
252 respectively. Additionally, we thank Tina Thorslund for sharing the pHA-BRCA2 cDNA with us.  
253 Furthermore, we want to thank Johannes C. Walter for sharing *Xenopus* antibodies and

254 reagents as well as Vincenzo Costanzo for sharing the *Xenopus* BRCA2 antibody. The PP2A-  
255 B56-LxxlxE motif structure shown in Figure 1A was kindly provided by Rebecca Page.

256

#### 257 **Author contributions**

258 S.M.A. performed all experimental work with the following exceptions. J.P.D. performed the  
259 *Xenopus* egg extract experiments. E.P.T.H., T.K., and V.H.O., contributed to cloning and  
260 establishment of RNAi set-up and generated preliminary data. I.N., L.C., and A.K. performed  
261 the mass spectrometry experiments. J.D. performed the TurboID experiment and made the  
262 model in Figure 4E. B.L.M. generated the ITC data. B.R. generated the *Xenopus* B56  
263 antibodies. T.H. gave clinical input on BRCA2 patient mutations. E.P.T.H. and J.N. purified  
264 recombinant proteins, and J.N. performed gel filtration experiments. V.H.O., M.L., and J.N.  
265 supervised the project. S.M.A. drafted the manuscript. All authors contributed to the writing of  
266 the manuscript.

267

#### 268 **Conflict of interest statements**

269 JN is on the scientific advisory board for Orion Pharma.

270 TvOH has received lecture honoraria from Pfizer.

271 The rest of the authors declare that they have no conflict of interest.



## 272 **References**

- 273 1. Chen, C. C., Feng, W., Lim, P. X., Kass, E. M. & Jasin, M. Homology-Directed Repair  
274 and the Role of BRCA1, BRCA2, and Related Proteins in Genome Integrity and Cancer.  
275 *Annu Rev Cancer Biol* **2**, 313–336 (2018).
- 276 2. Antoniou, A. *et al.* Average risks of breast and ovarian cancer associated with BRCA1 or  
277 BRCA2 mutations detected in case Series unselected for family history: a combined  
278 analysis of 22 studies. *Am J Hum Genet* **72**, 1117–30 (2003).
- 279 3. Chen, S. & Parmigiani, G. Meta-analysis of BRCA1 and BRCA2 penetrance. *J Clin*  
280 *Oncol* **25**, 1329–33 (2007).
- 281 4. Jensen, R. B., Carreira, A. & Kowalczykowski, S. C. Purified human BRCA2 stimulates  
282 RAD51-mediated recombination. *Nature* **467**, 678–83 (2010).
- 283 5. Liu, J., Doty, T., Gibson, B. & Heyer, W. D. Human BRCA2 protein promotes RAD51  
284 filament formation on RPA-covered single-stranded DNA. *Nat Struct Mol Biol* **17**, 1260–2  
285 (2010).
- 286 6. Thorslund, T. *et al.* The breast cancer tumor suppressor BRCA2 promotes the specific  
287 targeting of RAD51 to single-stranded DNA. *Nat Struct Mol Biol* **17**, 1263–5 (2010).
- 288 7. Wong, A. K., Pero, R., Ormonde, P. A., Tavtigian, S. V. & Bartel, P. L. RAD51 interacts  
289 with the evolutionarily conserved BRC motifs in the human breast cancer susceptibility  
290 gene *brca2*. *J Biol Chem* **272**, 31941–4 (1997).
- 291 8. Pellegrini, L. *et al.* Insights into DNA recombination from the structure of a RAD51–  
292 BRCA2 complex. *Nature* **420**, 287–293 (2002).
- 293 9. Chen, C. F., Chen, P. L., Zhong, Q., Sharp, Z. D. & Lee, W. H. Expression of BRC  
294 repeats in breast cancer cells disrupts the BRCA2-Rad51 complex and leads to radiation  
295 hypersensitivity and loss of G(2)/M checkpoint control. *J Biol Chem* **274**, 32931–5  
296 (1999).



- 297 10. Esashi, F., Galkin, V. E., Yu, X., Egelman, E. H. & West, S. C. Stabilization of RAD51  
298 nucleoprotein filaments by the C-terminal region of BRCA2. *Nat Struct Mol Biol* **14**, 468–  
299 74 (2007).
- 300 11. Davies, O. R. & Pellegrini, L. Interaction with the BRCA2 C terminus protects RAD51–  
301 DNA filaments from disassembly by BRC repeats. *Nat. Struct. Amp Mol. Biol.* **14**, 475  
302 (2007).
- 303 12. Xia, B. *et al.* Control of BRCA2 cellular and clinical functions by a nuclear partner,  
304 PALB2. *Mol Cell* **22**, 719–29 (2006).
- 305 13. Heyer, W.-D., Ehmsen, K. T. & Liu, J. Regulation of Homologous Recombination in  
306 Eukaryotes. *Annu. Rev. Genet.* **44**, 113–139 (2010).
- 307 14. Blackford, A. N. & Jackson, S. P. ATM, ATR, and DNA-PK: The Trinity at the Heart of  
308 the DNA Damage Response. *Mol Cell* **66**, 801–817 (2017).
- 309 15. Esashi, F. *et al.* CDK-dependent phosphorylation of BRCA2 as a regulatory mechanism  
310 for recombinational repair. *Nature* **434**, 598–604 (2005).
- 311 16. Lee, D.-H. *et al.* A PP4 phosphatase complex dephosphorylates RPA2 to facilitate DNA  
312 repair via homologous recombination. *Nat. Struct. Mol. Biol.* **17**, 365–372 (2010).
- 313 17. Kalev, P. *et al.* Loss of PPP2R2A inhibits homologous recombination DNA repair and  
314 predicts tumor sensitivity to PARP inhibition. *Cancer Res* **72**, 6414–24 (2012).
- 315 18. Isono, M. *et al.* BRCA1 Directs the Repair Pathway to Homologous Recombination by  
316 Promoting 53BP1 Dephosphorylation. *Cell Rep.* **18**, 520–532 (2017).
- 317 19. Roy, J. & Cyert, M. S. Cracking the phosphatase code: docking interactions determine  
318 substrate specificity. *Sci Signal* **2**, re9 (2009).
- 319 20. Hertz, E. P. T. *et al.* A Conserved Motif Provides Binding Specificity to the PP2A-B56  
320 Phosphatase. *Mol Cell* **63**, 686–695 (2016).
- 321 21. Ueki, Y. *et al.* A Consensus Binding Motif for the PP4 Protein Phosphatase. *Mol. Cell* **76**,  
322 953-964.e6 (2019).
- 323 22. Wang, X., Bajaj, R., Bollen, M., Peti, W. & Page, R. Expanding the PP2A Interactome by  
324 Defining a B56-Specific SLiM. *Structure* **24**, 2174–2181 (2016).

- 325 23. McCright, B., Rivers, A. M., Audlin, S. & Virshup, D. M. The B56 Family of Protein  
326 Phosphatase 2A (PP2A) Regulatory Subunits Encodes Differentiation-induced  
327 Phosphoproteins That Target PP2A to Both Nucleus and Cytoplasm. *J. Biol. Chem.* **271**,  
328 22081–22089 (1996).
- 329 24. Branon, T. C. *et al.* Efficient proximity labeling in living cells and organisms with TurboID.  
330 *Nat. Biotechnol.* **36**, 880–887 (2018).
- 331 25. Starita, L. M. *et al.* A Multiplex Homology-Directed DNA Repair Assay Reveals the  
332 Impact of More Than 1,000 BRCA1 Missense Substitution Variants on Protein Function.  
333 *Am J Hum Genet* **103**, 498–508 (2018).
- 334 26. Pierce, A. J., Johnson, R. D., Thompson, L. H. & Jasin, M. XRCC3 promotes homology-  
335 directed repair of DNA damage in mammalian cells. *Genes Dev* **13**, 2633–8 (1999).
- 336 27. Kruse, T. *et al.* Mechanisms of site-specific dephosphorylation and kinase opposition  
337 imposed by PP2A regulatory subunits. *EMBO J.* **39**, e103695 (2020).
- 338 28. Feng, W. & Jasin, M. BRCA2 suppresses replication stress-induced mitotic and G1  
339 abnormalities through homologous recombination. *Nat Commun* **8**, 525 (2017).
- 340 29. Ray Chaudhuri, A. *et al.* Replication fork stability confers chemoresistance in BRCA-  
341 deficient cells. *Nature* **535**, 382–7 (2016).
- 342 30. Evers, B. & Jonkers, J. Mouse models of BRCA1 and BRCA2 deficiency: past lessons,  
343 current understanding and future prospects. *Oncogene* **25**, 5885–97 (2006).
- 344 31. Patel, K. J. *et al.* Involvement of Brca2 in DNA repair. *Mol Cell* **1**, 347–57 (1998).
- 345 32. Kuznetsov, S. G., Liu, P. & Sharan, S. K. Mouse embryonic stem cell-based functional  
346 assay to evaluate mutations in BRCA2. *Nat. Med.* **14**, 875 (2008).
- 347 33. Yu, V. P. *et al.* Gross chromosomal rearrangements and genetic exchange between  
348 nonhomologous chromosomes following BRCA2 inactivation. *Genes Dev* **14**, 1400–6  
349 (2000).
- 350 34. Rahden-Staroń, I., Szumiło, M., Grosicka, E., Kraakman van der Zwet, M. & Zdzienicka,  
351 M. Z. Defective Brca2 influences topoisomerase I activity in mammalian cells. *Acta*  
352 *Biochim. Pol.* **50**, 139–144 (2003).

- 353 35. Bryant, H. E. *et al.* Specific killing of BRCA2-deficient tumours with inhibitors of  
354 poly(ADP-ribose) polymerase. *Nature* **434**, 913–917 (2005).
- 355 36. Farmer, H. *et al.* Targeting the DNA repair defect in BRCA mutant cells as a therapeutic  
356 strategy. *Nature* **434**, 917–21 (2005).
- 357 37. Lord, C. J. & Ashworth, A. PARP inhibitors: Synthetic lethality in the clinic. *Science* **355**,  
358 1152–1158 (2017).
- 359 38. Yuan, S. S. *et al.* BRCA2 is required for ionizing radiation-induced assembly of Rad51  
360 complex in vivo. *Cancer Res* **59**, 3547–51 (1999).
- 361 39. Räschle, M. *et al.* Mechanism of Replication-Coupled DNA Interstrand Crosslink Repair.  
362 *Cell* **134**, 969–980 (2008).
- 363 40. Parsons, M. T. *et al.* Large scale multifactorial likelihood quantitative analysis of BRCA1  
364 and BRCA2 variants: An ENIGMA resource to support clinical variant classification.  
365 *Hum. Mutat.* **40**, 1557–1578 (2019).
- 366 41. Wang, X. *et al.* A dynamic charge-charge interaction modulates PP2A:B56 substrate  
367 recruitment. *eLife* **9**, (2020).
- 368 42. Schlacher, K. *et al.* Double-strand break repair-independent role for BRCA2 in blocking  
369 stalled replication fork degradation by MRE11. *Cell* **145**, 529–42 (2011).
- 370 43. Brough, R. *et al.* APRIN is a cell cycle specific BRCA2-interacting protein required for  
371 genome integrity and a predictor of outcome after chemotherapy in breast cancer. *Embo*  
372 *J* **31**, 1160–76 (2012).
- 373 44. Morales, C. *et al.* PDS5 proteins are required for proper cohesin dynamics and  
374 participate in replication fork protection. *J. Biol. Chem.* **295**, 146–157 (2020).
- 375 45. Ehlén, Å. *et al.* Proper chromosome alignment depends on BRCA2 phosphorylation by  
376 PLK1. *Nat. Commun.* **11**, 1819 (2020).
- 377 46. Mazhar, S., Taylor, S. E., Sangodkar, J. & Narla, G. Targeting PP2A in cancer:  
378 Combination therapies. *Biochim. Biophys. Acta BBA - Mol. Cell Res.* **1866**, 51–63  
379 (2019).

- 380 47. Kruse, T. *et al.* Direct binding between BubR1 and B56-PP2A phosphatase complexes  
381 regulate mitotic progression. *J. Cell Sci.* **126**, 1086–1092 (2013).
- 382 48. Kruse, T. *et al.* Mechanisms of site-specific dephosphorylation and kinase opposition  
383 imposed by PP2A regulatory subunits. *EMBO J.* **39**, e103695 (2020).
- 384 49. Larsen, N. B. *et al.* Replication-Coupled DNA-Protein Crosslink Repair by SPRTN and  
385 the Proteasome in *Xenopus* Egg Extracts. *Mol. Cell* **73**, 574-588.e7 (2019).
- 386 50. Long, D. T., Joukov, V., Budzowska, M. & Walter, J. C. BRCA1 promotes unloading of  
387 the CMG helicase from a stalled DNA replication fork. *Mol Cell* **56**, 174–85 (2014).
- 388 51. Kolinjivadi, A. M. *et al.* Smarcal1-Mediated Fork Reversal Triggers Mre11-Dependent  
389 Degradation of Nascent DNA in the Absence of Brca2 and Stable Rad51  
390 Nucleofilaments. *Mol. Cell* **67**, 867-881.e7 (2017).
- 391 52. Long, D. T., Raschle, M., Joukov, V. & Walter, J. C. Mechanism of RAD51-dependent  
392 DNA interstrand cross-link repair. *Science* **333**, 84–7 (2011).
- 393 53. Walter, J. & Newport, J. Initiation of eukaryotic DNA replication: origin unwinding and  
394 sequential chromatin association of Cdc45, RPA, and DNA polymerase alpha. *Mol. Cell*  
395 **5**, 617–627 (2000).
- 396 54. Fang, F. & Newport, J. W. Distinct roles of cdk2 and cdc2 in RP-A phosphorylation  
397 during the cell cycle. *J. Cell Sci.* **106 ( Pt 3)**, 983–994 (1993).
- 398 55. Eng, J. K., Jahan, T. A. & Hoopmann, M. R. Comet: An open-source MS/MS sequence  
399 database search tool. *PROTEOMICS* **13**, 22–24 (2013).
- 400 56. Elias, J. E. & Gygi, S. P. Target-decoy search strategy for increased confidence in large-  
401 scale protein identifications by mass spectrometry. *Nat. Methods* **4**, 207–214 (2007).
- 402 57. Valot, B., Langella, O., Nano, E. & Zivy, M. MassChroQ: A versatile tool for mass  
403 spectrometry quantification. *PROTEOMICS* **11**, 3572–3577 (2011).
- 404 58. Schwanhäusser, B. *et al.* Global quantification of mammalian gene expression control.  
405 *Nature* **473**, 337–342 (2011).
- 406 59. Tyanova, S. *et al.* Proteomic maps of breast cancer subtypes. *Nat. Commun.* **7**, 10259  
407 (2016).

- 408 60. Lebofsky, R., Takahashi, T. & Walter, J. C. DNA replication in nucleus-free *Xenopus* egg  
409 extracts. *Methods Mol. Biol. Clifton NJ* **521**, 229–252 (2009).
- 410 61. Kumar, S., Stecher, G., Suleski, M. & Hedges, S. B. TimeTree: A Resource for  
411 Timelines, Timetrees, and Divergence Times. *Mol. Biol. Evol.* **34**, 1812–1819 (2017).
- 412

## 413 **Methods**

414

### 415 **Cell culture**

416 U2OS cells, HeLa cells, and derived cell lines from these were cultured in Dulbecco's Modified  
417 Eagle Medium with GlutaMAX (Life Technologies) supplemented with 10% fetal bovine serum  
418 (Gibco) and 10 units/mL of penicillin and 10 µg/mL of streptomycin (Gibco) at 37°C with 5%  
419 CO<sub>2</sub>. Expression from the CMV-TetO2 promoter in Flp-In T-REx cells was induced by  
420 treatment with 10 ng/mL doxycycline (Clontech) for 24 hours. To synchronize cells to S phase,  
421 cells were incubated in growth medium with 2.5 mM thymidine (Sigma) for 24 hours unless  
422 otherwise indicated. Cells were released from thymidine by washing twice in PBS and adding  
423 growth medium. Mitomycin C (MMC, Sigma), camptothecin (CPT, Sigma), Olaparib  
424 (AZD2281, Selleckchem), KU55933 (ATM kinase inhibitor, Selleckchem) and AZ20 (ATR  
425 kinase inhibitor, Selleckchem) were added at the indicated doses to the growth medium.

426

### 427 **Cloning**

428 A vector for stable high-level expression of BRCA2 in human cells,  
429 pcDNA5/FRT/hCMV/Venus-MBP-BRCA2, was generated by swapping the tetracycline-  
430 regulated CMV-TetO2 promoter in pcDNA5/FRT/TO with the high-level expression hCMV  
431 promoter from phCMV1 using MluI and BspTI restriction sites. To further increase the stability  
432 of BRCA2, Venus and MBP were inserted using HindIII and KpnI restriction sites. Finally,  
433 full-length BRCA2 was PCR amplified from pHA-BRCA2 (generous gift from Tina Thorslund)  
434 and inserted using KpnI and NotI restriction sites to generate pcDNA5/FRT/hCMV/Venus-  
435 MBP-BRCA2. To facilitate site-directed mutagenesis of full-length BRCA2, two cloning  
436 cassettes were generated using the internal NheI restriction site in combination with either  
437 KpnI or NotI encompassing BRCA2 CDS nucleotide positions 1-4584 and 4578-10257,  
438 respectively. These fragments were used as templates to introduce mutations in the PP2A-  
439 B56 binding region and silent mutations to obtain siRNA-resistance, respectively, and then  
440 reintroduced into pcDNA5/FRT/hCMV/Venus-MBP-BRCA2. For generation of

441 pcDNA5/FRT/hCMV/mCherry-MBP-BRCA2, a synthetic cDNA of mCherry-MBP was  
442 synthesized (GeneArt) and swapped for Venus and MBP using HindIII and KpnI restriction  
443 sites. A vector for inducible expression of BRCA2 fragments in human cells for biochemistry,  
444 pcDNA5/FRT/TO/Myc-BRCA2<sup>1001-1255</sup>, was generated by PCR amplifying BRCA2<sup>1001-1255</sup> with  
445 Myc tag-encoding overhangs and subsequent subcloning into pcDNA5/FRT/TO using BamHI  
446 and NotI restriction sites. Site-directed mutagenesis was performed to introduce mutations in  
447 the PP2A-B56 binding region. Similarly, pcDNA5/FRT/TO/3xFLAG-Venus-BRCA2<sup>1001-1255</sup> was  
448 generated by PCR amplification of BRCA2<sup>1001-1255</sup> and subsequent subcloning into  
449 pcDNA5/FRT/TO/3xFLAG-Venus using BamHI and NotI restriction sites.  
450 pcDNA5/FRT/TO/HA-TurboID-B56 $\gamma$  was generated by cloning B56 $\gamma$  into  
451 pcDNA5/FRT/TO/HA-TurboID. Primer sequences are enclosed in Table S4. Additionally,  
452 pcDNA5/FRT/TO/Venus-B56 $\gamma$ <sup>147</sup>, pcDNA5/FRT/TO/mCherry-B56 inhibitor, and  
453 pcDNA5/FRT/TO/mCherry-Ctrl inhibitor (3A)<sup>48</sup> were used in this study.

454

#### 455 **Generation of stable Flp-In T-REx cell lines**

456 U2OS Flp-In T-Rex (a kind gift from Helen Piwnicka-Worms), HeLa Flp-In-T-Rex (a kind gift  
457 from Stephen Taylor), or HeLa DR-GFP Flp-In (a kind gift from Jeffrey Parvin) cells were grown  
458 in medium supplemented with 100  $\mu$ g/mL Zeocin (Invitrogen). To generate stable cell lines in  
459 the Flp-In system, cells were co-transfected with pOG44 (Invitrogen) and a pcDNA5/FRT  
460 plasmid of interest using the Fugene 6 transfection kit (Promega) or Lipofectamine 2000  
461 (Invitrogen). After transfection, Flp-In T-REx cells were selected in medium supplemented with  
462 200  $\mu$ g/mL Hygromycin B (Invitrogen). Individual clones were selected and analyzed for  
463 expression. For T-REx cells, selection included 5  $\mu$ g/mL blasticidin S HCl (Sigma).

464

#### 465 **Transfection**

466 For transient protein expression, cells were transfected with Lipofectamine 2000 (Invitrogen)  
467 and the plasmid of interest and incubated for 48 hours unless otherwise stated. For BRCA2



468 knockdown, cells were transfected twice with 10 nM Silencer Select BRCA2 s2084 siRNA and  
469 10 nM Silencer Select BRCA2 s2085 siRNA (Ambion) using Lipofectamine RNAiMAX  
470 (Invitrogen) 24 and 48 hours before the experiment. A luciferase oligo (5'-  
471 CGUACGCGGAAUACUUCGAdTdT-3', Sigma) was used for control (Ctrl).

472

### 473 **DR-GFP reporter assay**

474 To analyze HR efficiency for full-length BRCA2 constructs, HeLa DR-GFP Flp-In cells parental  
475 or stably expressing siRNA resistant mCherry-MBP-BRCA2 were transfected with Ctrl or  
476 BRCA2 siRNA as described above. The second siRNA transfection was combined with  
477 transient transfection with or without an I-SceI-encoding plasmid. After 48 hours, cells were  
478 trypsinized, dissolved in 2% BSA in PBS, stained with 1  $\mu$ g/mL DAPI, and analyzed on a BD  
479 LSRFortessa flow cytometer (BD biosciences) for FSC (A, W, H), SSC (A), DAPI (A), and GFP  
480 (A). Debris and doublets were excluded by gating. Living cells were gated by excluding DAPI  
481 positive cells. The fraction of GFP positive cells was quantified and the background (without  
482 I-SceI endonuclease) was subtracted for each condition. Graphs were constructed in PRISM.  
483 For the B56 inhibitor experiment, HeLa DR-GFP Flp-In cells were transiently transfected with  
484 a plasmid encoding an mCherry-tagged version of the B56 substrate inhibitor or a control  
485 version of the inhibitor described previously<sup>48</sup> either with or without an I-SceI-encoding  
486 plasmid. After 48 hours, cells were prepared and analyzed as described above but using  
487 mCherry (A) to gate transfected cells. The fraction of GFP positive cells in the mCherry positive  
488 population was quantified, and the background (without I-SceI endonuclease) was subtracted  
489 for each condition. Graphs were constructed in PRISM, and a Student's t-test was performed  
490 to determine the p-value.

491

### 492 **Colony formation assay**

493 U2OS Flp-In T-REx cells parental or expressing siRNA-resistant venus-MBP-BRCA2  
494 constructs were transfected with Ctrl or BRCA2 siRNA as described above. Then, cells were  
495 either treated with 0, 3, or 10 ng/mL Mitomycin C for 24 hours followed by reseeding into



496 normal growth medium or reseeded directly and either treated for 24 hours with 0, 5, or 15 nM  
497 CPT or continuously maintained in medium containing 0, 5.6, 16.7, or 50 nM Olaparib.  
498 Reseeding was performed by trypsinizing the cells, dissolving into growth medium, and  
499 counting the number of cells using the Scepter Cell Counter (Merck), followed by seeding a  
500 known number of cells into 6-well plates containing growth medium. After 11 days, the cells  
501 were fixed and stained in 0.5% methylviolet, 25% methanol. The plates were scanned on a  
502 GelCount (Oxford Optronix), and the number of colonies were quantified using the GelCount  
503 software. The plating efficiency (%) for each well was calculated as the number of colonies  
504 divided by the number of cells seeded times 100. The surviving fraction for each dose of drug  
505 was calculated by normalizing the plating efficiency to that of the unperturbed condition.  
506 Graphs were constructed in PRISM (Graphpad), and one-way ANOVA analyses with  
507 Dunnett's multiple comparison tests were performed comparing the averages of each  
508 condition to the siBRCA2 + WT condition for a minimum of three independent experiments.

509

#### 510 **Immunofluorescence microscopy**

511 U2OS Flp-In T-REx cells parental or expressing siRNA-resistant venus-MBP-BRCA2  
512 constructs were seeded in  $\mu$ -Slide 8-well dishes (Ibidi). Alongside Ctrl or BRCA2 siRNA  
513 transfection as described above, cells were synchronized to S phase with a single 24-hour 2  
514 mM thymidine block. Cells were released from the block, treated with 3  $\mu$ M MMC for 1 hour,  
515 and then allowed to recover for 8 hours in normal growth medium. Cells were fixed and  
516 permeabilized by incubation in 4% formaldehyde for 10 minutes, 0.1% Triton-X-100 in PBS-T  
517 for 10 minutes, and 25 mM glycine for 20 minutes, followed by blocking in 3% BSA (Sigma) in  
518 PBS-T for 30 minutes. Cells were incubated with primary antibody, rabbit-anti-RAD51  
519 (Bioacademia 70-001) 1:1000 in blocking solution, for 90 minutes, followed by washing in TBS-  
520 T and incubation with secondary antibody, AlexaFluor 546 nm Goat-anti-rabbit IgG (Life  
521 Technologies, A-11010) 1:1000 and 1  $\mu$ g/mL DAPI, in blocking solution for 45 minutes. Finally,  
522 cells were washed in PBS-T and analysed on a Deltavision Elite microscope using a 40X oil

523 objective. Images were deconvoluted using SoftWoRx (GE healthcare), and Z stacks  
524 combined using the Quick projection function. The number of RAD51 foci in each nucleus was  
525 quantified using the polygon finder function. Graphs were constructed in PRISM.

526

## 527 **Antibodies**

528 Commercially available antibodies against the following proteins were used for Western  
529 blotting in the indicated dilutions: BRCA2 (OP95, Calbiochem, 1:1000), RAD51 (70-001,  
530 Bioacademia, 1:1000), mCherry (RFP) (PM005, MBL International, 1:1000), Myc (Sc-40,  
531 Santa Cruz, 1:750), PALB2 (A301-246A – M, Bethyl, 1:1000), GAPDH (Sc-25778, Santa Cruz,  
532 1:5000), tubulin (Ab6160, Abcam, 1:5000), histone 3 (Ab1791, Abcam, 1:1000), pS345-CHK1  
533 (#2341, Cell signaling, 1:1000), pS1981-ATM (MAB3806, Millipore, 1:2000), PP2A-C (05-421,  
534 Sigma-Aldrich, 1:1000). Additionally, an antibody against GFP was used (Serum produced by  
535 Moravian, affinity purified against full-length GFP). Phospho-specific polyclonal antibodies  
536 against BRCA2-pT1104/pS1106 and BRCA2-pT1128 were raised in rabbits using  
537 phosphorylated peptides of BRCA2 for immunization, affinity purification, and validation  
538 (SNHNL(pT)P(pS)QKAEI for BRCA2-pT1104/pS1106 (21<sup>st</sup> Century Biochemicals) and  
539 CQFEF(pT)QFRKPS for BRCA2-pT1128 (Moravian)).

540 Antibodies against *Xenopus* MCM6<sup>49</sup>, BRCA2<sup>50</sup>, BRCA2<sup>51</sup> (Fig. S4D), RAD51<sup>52</sup>,  
541 RPA<sup>53</sup>, and ORC2<sup>54</sup> were described previously. Additional antibodies against the following  
542 *Xenopus* proteins were raised in rabbits against the following peptides: BRCA2 (Ac-  
543 KPHIKEDQNEPESNSEYIC-amide, New England Peptide) as described previously<sup>51</sup>, WRN  
544 (H2N-MTSLQRKLPEWMSVKC-amide, New England Peptide), B56 $\alpha$   
545 (MSAISAAEKVDGFTRKSVRK, Peptide Speciality Laboratories GmbH), and B56 $\gamma$   
546 (MPNKNKKDKPEPKAGKSGKS, Peptide Speciality Laboratories GmbH). The antibody  
547 against *Xenopus* BRCA2-pT1196 was raised against human BRCA2-pT1128 (see above).

548

## 549 **Whole cell extracts, immunoprecipitation, and Western blotting.**

550 For whole cell extracts, cells were lysed in ice-cold RIPA buffer (10 mM Tris, pH 7.4, 150 mM  
551 NaCl, 1 mM EDTA, 1% NP-40, 0.5% sodium deoxycholate, 0.1% SDS), and cell lysates were  
552 cleared by centrifugation at 20000 g at 4°C. Protein concentrations in cell lysates were  
553 determined using Bradford protein assay kit (Bio-Rad) or Pierce BCA protein assay kit  
554 (Thermo Fisher Scientific).

555 For GFP-trap immunoprecipitation of Venus and Venus-B56 $\gamma$ , HeLa Flp-In T-Rex cells  
556 stably expressing doxycycline-inducible Venus or Venus-B56 $\gamma$  were transiently transfected  
557 with the indicated constructs of pcDNA5/FRT/TO/Myc-BRCA2<sup>1001-1255</sup>, induced with 10 ng/mL  
558 doxycycline, and incubated with 3 ng/mL MMC for 24 hours prior to cell harvest. Cells were  
559 lysed in ice-cold low salt lysis buffer (50 mM Tris, pH 7.4, 50 mM NaCl, 1 mM EDTA, 0.1%  
560 Igepal). Cell lysates were cleared by centrifugation at 20000 g at 4°C, and proteins were  
561 purified by GFP-trap (ChromoTek) immunoprecipitation for 1 hour at 4°C. Beads were washed  
562 in ice-cold no salt wash buffer (50 mM Tris pH 7.4, 20% glycerol, 1 mg/mL BSA) prior to elution.

563 For GFP-trap immunoprecipitation of Venus and Venus-BRCA2<sup>1001-1255</sup>, HeLa cells  
564 were transiently transfected with pcDNA5/FRT/TO/Venus or pcDNA5/FRT/TO/Venus-  
565 BRCA2<sup>1001-1255</sup>, synchronized to S phase as described above, released for 2 hours and then  
566 treated for 2 hours with 100 nM CPT prior to cell harvest. Cells were lysed and proteins purified  
567 by GFP-trap immunoprecipitation in low salt lysis buffer as described above. Beads were  
568 washed in low salt lysis buffer prior to elution.

569 For GFP-trap immunoprecipitation of Venus-MBP-BRCA2, U2OS Flp-In T-REx stably  
570 expressing constructs of Venus-MBP-BRCA2 were lysed and proteins immunoprecipitated as  
571 described above but in a standard salt lysis buffer (50 mM Tris, pH 7.4, 150 mM NaCl, 1 mM  
572 EDTA, 0.1% Igepal).

573 For immunoprecipitations of endogenous BRCA2, U2OS Flp-In T-REx cells were  
574 synchronized to S-phase as described above, released for 1 hour, and treated for 1 hour with  
575 2  $\mu$ M CPT in presence or absence of 25  $\mu$ M KU55933 (ATM kinase inhibitor) and 5  $\mu$ M AZ20  
576 (ATR kinase inhibitor). Cells were lysed in RIPA buffer, and proteins were immunoprecipitated

577 on BRCA2 antibody-conjugated (OP95, Calbiochem) Rec-protein G Sepharose 4B beads  
578 (Invitrogen) for 1 hour at 4°C and washed in RIPA buffer prior to elution.

579 All buffers were supplemented with 1 mM DTT, Complete protease inhibitor cocktail  
580 (Roche), and PhosSTOP phosphatase inhibitor cocktail (Roche). For  $\lambda$  phosphatase treatment  
581 experiments, immunoprecipitants on beads were washed in buffer without phosphatase  
582 inhibitor and incubated with  $\lambda$  phosphatase (Sigma Aldrich) in the applied buffer for 20 minutes  
583 at 30°C before elution. Immunoprecipitants were eluted in 2X NuPage LDS sample buffer  
584 (Invitrogen). Whole cell extracts and immunoprecipitations were analyzed by SDS-PAGE and  
585 Western blotting or mass spectrometry analysis. For Western blotting, samples were boiled  
586 for 5 minutes in NuPage LDS sample buffer and run on NuPage Bis-Tris 4-12% protein gels  
587 (Invitrogen), and proteins were transferred to PVDF membranes (Immobilon-FL, Merck). For  
588 dot blots, the indicated peptides were spotted onto nitrocellulose membranes (Hybond-C  
589 extra, Amersham Biosciences) in 5-fold dilutions (highest amount 2  $\mu$ g). *Xenopus* samples  
590 (see below) were prepared in 2X Laemmli sample buffer, boiled for 5 min, run on 4–12%  
591 Criterion XT Bis-Tris Protein Gels (Bio-rad), and proteins were transferred to Polyscreen (R)  
592 PVDF transfer membranes (PerkinElmer). All membranes were blocked in 5% skim milk or  
593 BSA, incubated in primary antibody solution overnight at 4°C, washed in TBS-T, incubated in  
594 secondary antibody for 1 hour, washed again in TBS-T, and imaged with the Odyssey® CLx  
595 (LI-COR) or incubated with ECL reagent and imaged on an ImageQuant LAS4000 (Cytiva).  
596 Quantification of Western blots were carried out in Image Studio Lite (LI-COR).

597

### 598 **Fractionation assay**

599 U2OS Flp-In T-REx cells stably expressing Venus-MBP-BRCA2 were transfected with BRCA2  
600 siRNA as described above prior to lysis in low salt lysis buffer. Upon clearing of the lysates,  
601 supernatants were stored as the soluble fractions. The pellets were resuspended and lysed in  
602 RIPA buffer supplemented with benzonase nuclease (Merck Millipore). Lysates were

603 centrifuged again, and the supernatants were stored as the chromatin fractions. The soluble  
604 and chromatin fractions were analyzed by SDS-PAGE and Western blotting.

605

### 606 **Biotin proximity labeling assay**

607 HeLa Flp-In T-Rex encoding doxycycline-inducible TurboID-B56 $\gamma$  were induced with 4 ng/mL  
608 doxycycline alongside synchronization to S phase as described above. Cells were released  
609 for 2 hours in presence of 100 nM CPT, and 50  $\mu$ M biotin (Sigma) was added 30 minutes  
610 before harvest. Biotinylated proteins were purified on High Capacity Streptavidin Agarose  
611 beads (Thermo Scientific) in RIPA buffer and proteins were identified by mass spectrometry.

612

### 613 **Protein expression**

614 BRCA2<sup>1089-1143</sup> WT and 2A (L1114A-I1117A) were cloned into pGEX-4T-1 to generate N-  
615 terminally GST-tagged fusion proteins. Constructs were transformed into *E. coli* BL21 (DE3)  
616 cells and expression was induced by addition of 0.5 mM IPTG at 37°C for 3 h. Bacterial pellets  
617 were resuspended in ice-cold lysis buffer (50 mM Tris-HCl pH 7.4, 300 mM NaCl, 10%  
618 glycerol, 5 mM  $\beta$ -mercaptoethanol, 1 mM phenylmethyl sulfonyl fluoride, and complete EDTA-  
619 free Protease Inhibitor Cocktail tablets (Roche)) and lysed in an EmulsiFlex-C3 High Pressure  
620 Homogenizer (Avestin). Lysates were cleared at 26,200g for 30 min at 4°C and supernatants  
621 were incubated with pre-washed Glutathione Sepharose 4 Fast Flow beads (GE Healthcare)  
622 for 90 min at 4°C with mixing. Beads were washed six times in ice-cold lysis buffer, and GST-  
623 fusion proteins were eluted at 22°C for 30 min, 1250 rpm in elution buffer (50 mM Tris pH 8.8,  
624 300 mM NaCl, 10% glycerol, 5 mM  $\beta$ -mercaptoethanol, 20 mM reduced glutathione). Eluates  
625 were further purified by gel filtration on a Superdex 75 10/300 GL column. His-tagged B56 $\alpha$   
626 was expressed in the *E. coli* strain BL21 Rosetta2 (DE3) R3 T1 at 18°C for 20 hours using 0.5  
627 mM IPTG. The bacterial pellets were resuspended in ice-cold buffer L (50mM NaP, 300mM  
628 NaCl, 10% Glycerol, 0.5 mM TCEP, pH 7.5) containing complete EDTA-free Protease Inhibitor  
629 Cocktail tablets and lysed with an EmulsiFlex-C3 High Pressure Homogenizer. The lysate was

630 centrifuged at 18500 g for 30 minutes and the supernatant filtered through a 0.22  $\mu\text{m}$  PES  
631 filter and loaded onto a 1 mL Ni column (GE healthcare) in buffer L with 10 mM imidazole,  
632 washed and eluted. The eluate was loaded on a Superdex 200 PG 16/60 equilibrated with  
633 SEC buffer (50 mM NaP, 150 mM NaCl, 0.5 mM TCEP, 10% Glycerol, pH 7.50) and fractions  
634 analyzed by SDS-PAGE and verified by mass spectrometry.

635

### 636 **Isothermal titration calorimetry (ITC)**

637 Peptides were purchased from Peptide 2.0 Inc. (Chantilly, VA, USA). The purity obtained in  
638 the synthesis was 95 – 98% as determined by high performance liquid chromatography  
639 (HPLC) and subsequent analysis by mass spectrometry. Both recombinant B56 $\alpha$  and  
640 synthetic BRCA2 peptides were extensively dialyzed prior to ITC experiments against the ITC  
641 buffer (50 mM sodium phosphate pH 7.5, 150 mM NaCl, 0.5 mM TCEP). All experiments were  
642 performed on a MicroCal Auto-iTC200 (Malvern Panalytical) instrument at 25°C. Both peptide  
643 and B56 $\alpha$  concentrations were determined using a spectrophotometer by measuring the  
644 absorbance at 280 nm and applying values for the extinction coefficients as computed from  
645 the corresponding sequences by the ProtParam program (<http://web.expasy.org/protparam/>).  
646 The BRCA2 peptides were loaded into the syringe and titrated into the calorimetric cell  
647 containing B56 $\alpha$ . The reference cell was filled with distilled water. Control experiments with  
648 the peptides injected in the sample cell filled with buffer were carried out under the same  
649 experimental conditions. These control experiments showed negligible heats of dilution in all  
650 cases. The titration sequence consisted of a single 0.4  $\mu\text{l}$  injection followed by 19 injections,  
651 2  $\mu\text{l}$  each, with 150 s spacing between injections to ensure that the thermal power returns to  
652 the baseline before the next injection. The stirring speed was 750 rpm. The heats per injection  
653 normalized per mole of injectant *versus* the molar ratio [BRCA2 peptide]/[B56 $\alpha$ ] were fitted to  
654 a single-site model. Data were analysed with MicroCal PEAQ-ITC (version 1.1.0.1262)  
655 analysis software (Malvern Panalytical).

656

### 657 **Gel filtration**

658 To analyze the binding between BRCA2 and B56 $\alpha$  by gel filtration, 100  $\mu$ g of B56 $\alpha$  was  
659 incubated with 40  $\mu$ g of GST or GST-BRCA2<sup>1089-1143</sup> in buffer G (150 mM NaCl, 25 mM Tris  
660 8.0, 10% glycerol, 1mM DTT) in a total volume of 525  $\mu$ l. Following incubation, the sample  
661 was loaded on a Superdex 200 10/300 column (GE Healthcare) and fractions were analysed  
662 by SDS-PAGE and Coomassie blue staining.

663

#### 664 **Label-free LC-MS/MS analysis**

665 Pull-downs were analyzed on a Q-Exactive Plus quadrupole or Fusion Orbitrap Lumos mass  
666 spectrometer (ThermoScientific) equipped with Easy-nLC 1000 or 12000 (ThermoScientific)  
667 and nanospray source (ThermoScientific). Peptides were resuspended in 5% methanol / 1%  
668 formic acid and analyzed as previously described<sup>48</sup>.

669 Raw data were searched using COMET (release version 2014.01) in high resolution mode<sup>55</sup>  
670 against a target-decoy (reversed)<sup>56</sup> version of the human proteome sequence database  
671 (UniProt; downloaded 2/2020, 40704 entries of forward and reverse protein sequences) with  
672 a precursor mass tolerance of +/- 1 Da and a fragment ion mass tolerance of 0.02 Da, and  
673 requiring fully tryptic peptides (K, R; not preceding P) with up to three mis-cleavages. Static  
674 modifications included carbamidomethylcysteine and variable modifications included: oxidized  
675 methionine. Searches were filtered using orthogonal measures including mass measurement  
676 accuracy (+/- 3 ppm), Xcorr for charges from +2 through +4, and dCn targeting a <1% FDR at  
677 the peptide level. Quantification of LC-MS/MS spectra was performed using MassChroQ<sup>57</sup> and  
678 the iBAQ method<sup>58</sup>. Missing values were imputed from a normal distribution in Perseus to  
679 enable statistical analysis<sup>59</sup>. For further analysis, proteins had to be identified in the B56 $\gamma$  +dox  
680 +biotin or Venus-BRCA2 samples with more than 1 total peptide and quantified in 2 or more  
681 replicates. B56 $\gamma$  or BRCA2 protein abundances were normalized to be equal across all  
682 samples. Statistical analysis was carried out in Perseus by two-tailed Student's t-test.

683

#### 684 ***Xenopus* egg extract work**



685 *Xenopus* egg extracts preparation and reactions

686 *Xenopus* egg extracts were prepared as described before<sup>60</sup>. For replication of pICL<sup>Pt</sup>, the  
687 plasmid was first licensed in high-speed supernatant (HSS) extract for 30 min at RT at a final  
688 DNA concentration of 7.5 ng/mL. DNA replication was then initiated by adding two volumes of  
689 nucleoplasmic egg extract (NPE). For all other non-replicating reactions DNA was  
690 supplemented to NPE at a final concentration of 15 ng/mL. When indicated ATM inhibitor (KU-  
691 55933, Selleckchem), ATR inhibitor (AZ20, Sigma) or DNA-PK inhibitor (NU 7441,  
692 Selleckchem) were added to NPE to a final concentration of 100  $\mu$ M 10 min prior to initiating  
693 the reaction. To visualize DNA replication intermediates, reactions were supplemented with  
694 [ $\alpha$ -<sup>32</sup>P] dCTP (Perkin Elmer) and 1.5  $\mu$ L of each time point was added to 5 mL of stop buffer  
695 (5% SDS, 80 mM Tris pH 8.0, 0.13% phosphoric acid, 10% Ficoll). Proteins were digested by  
696 adding 1 mL of Proteinase K (20 mg/mL) (Roche) for 1 hour at 37°C. Replication intermediates  
697 were separated by 0.9% native agarose gel electrophoresis and visualized using a  
698 phosphorimager.

699 *DNA constructs*

700 pICL<sup>Pt</sup> was prepared as previously described<sup>39</sup>. To generate closed circular or linear DNA  
701 substrates, pBlueScript was either untreated or linearized with XhoI and the respective  
702 species purified via gel electrophoresis.

703 *Immunoprecipitations and immunodepletions*

704 To immunodeplete BRCA2 from NPE, one volume of Protein A Sepharose Fast Flow (PAS)  
705 (GE Health Care) beads was bound to five volumes of affinity purified BRCA2 antibody (1  
706 mg/mL) overnight at 4°C. The beads were then washed once with PBS, once with ELB (10  
707 mM HEPES pH 7.7, 50 mM KCl, 2.5 mM MgCl<sub>2</sub>, and 250 mM sucrose), twice with ELB  
708 supplemented with 0.5 M NaCl, and twice with ELB. One volume of NPE was then depleted  
709 by mixing with 0.2 volumes of antibody-bound beads incubated at room temperature for 15



710 min. The supernatant was recovered, and the depletion procedure repeated 3 additional  
711 times. The mock depletion was performed similarly using purified IgG from pre-immune serum.

712 For immunoprecipitation experiments, 5 mL of PAS beads were incubated with 10 mg of the  
713 indicated affinity purified antibody. The sepharose beads were washed twice with PBS and  
714 three times with IP buffer 1 (10 mM Hepes pH 7.7, 50 mM KCl, 2.5 mM MgCl<sub>2</sub>, 0.25% NP-40).  
715 5 mL of NPE was diluted with 20 mL of IP buffer and incubated with antibody prebound beads  
716 for 1 hour at RT. The beads were then washed three times with IP buffer and resuspended in  
717 50 mL of 2x Laemmli sample buffer before analysis by Western blotting.

#### 718 *Plasmid pull-down*

719 For plasmid pull-down experiments, 10 mL of streptavidin-coupled magnetic beads (Dynabead  
720 M-280, Invitrogen) per pull-down reaction were equilibrated with wash buffer 1 (50 mM Tris-  
721 HCl, pH 7.5, 150 mM NaCl, 1mM EDTA pH 8, 0.02% Tween 20) and then incubated with 12  
722 pmol of biotinylated Lacl at RT for 40 min. The beads were washed four times with pull-down  
723 buffer (10 mM Hepes pH 7.7, 50 mM KCl, 2.5 mM MgCl<sub>2</sub>, 250 mM sucrose, 0.02% Tween 20).  
724 225 ng of either closed circular or linear pBlueScript was bound to beads for 45 min. The  
725 beads were then washed twice with pull-down buffer and resuspended in 15 mL of NPE  
726 supplemented with Tween 20 to a final concentration of 0.02%. The reaction was incubated  
727 for 15 min at RT, washed twice in pull-down buffer and resuspended in 30 mL of 2X Laemmli  
728 sample buffer before analysis by Western blotting.

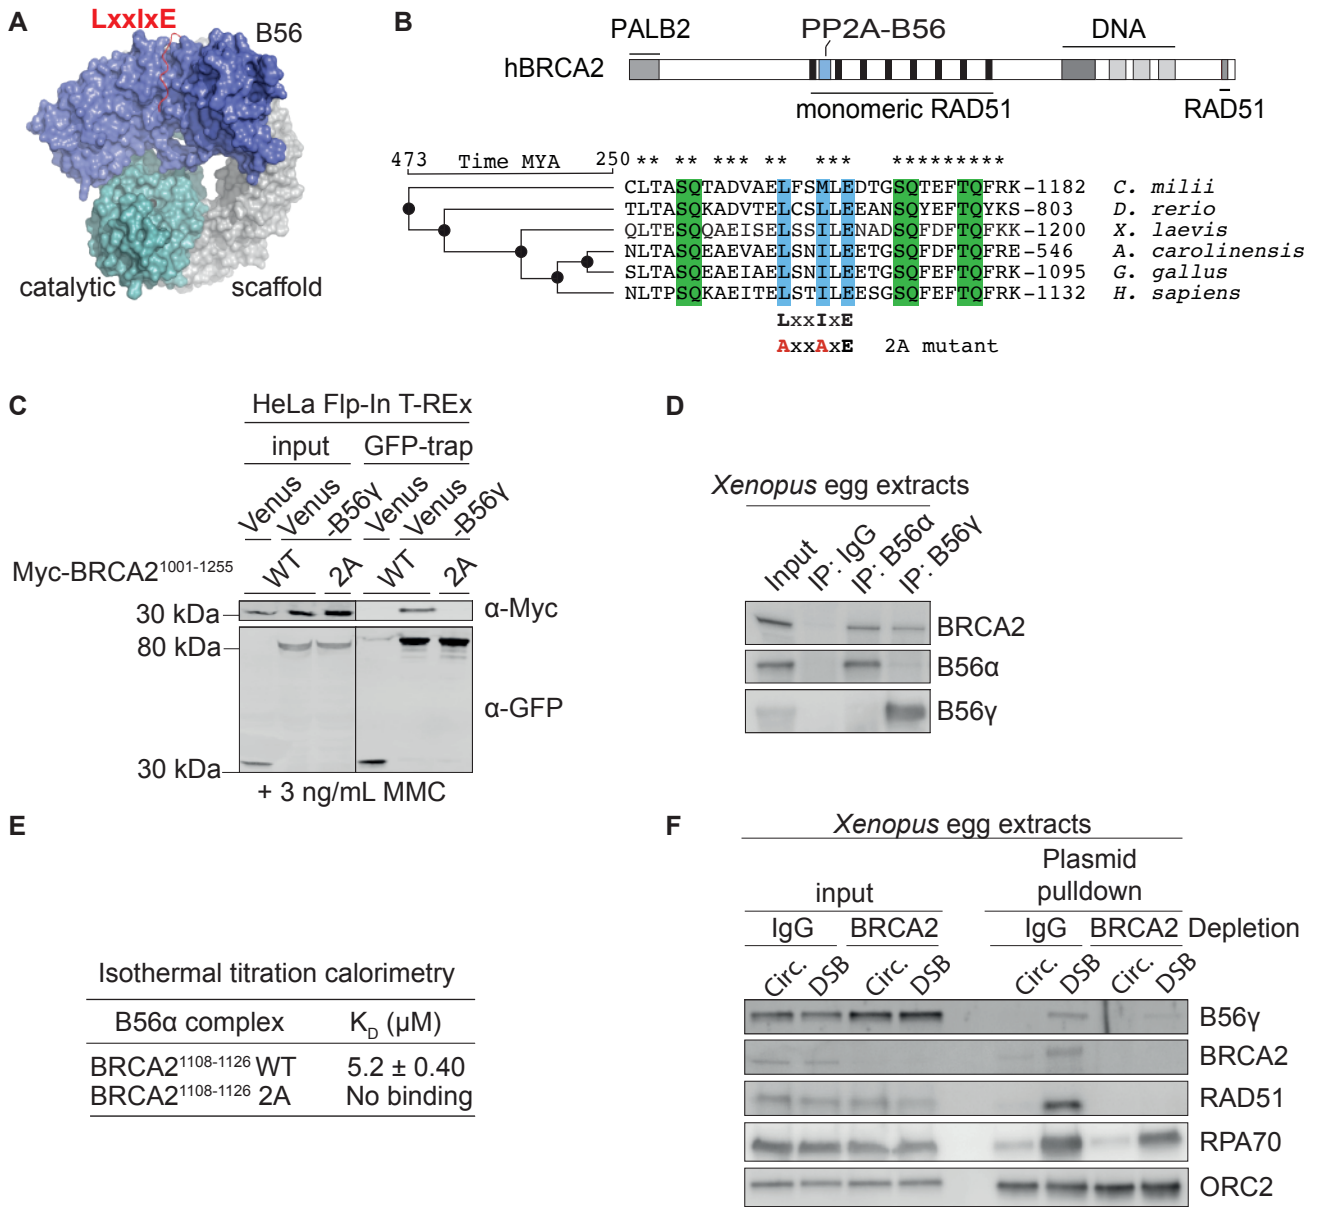

Figure 1.

729 **Figure 1. BRCA2 binds PP2A-B56 through a conserved LxxlxE motif and recruits it to**  
730 **DSBs.**

731 A. Structure of the PP2A-B56 holoenzyme with an LxxlxE motif-containing peptide bound. B.  
732 Top: Domain organization of human BRCA2 with selected interaction domains and the PP2A-  
733 B56 binding motif indicated. Bottom: Sequence alignment of vertebrate BRCA2 protein  
734 sequences. LxxlxE motif is marked in blue and SQ/TQ sites in green. The sequence of the  
735 human 2A (L1114A, I1117A) mutation is shown. \*, conserved residues. Evolution tree using  
736 the TimeTree database<sup>61</sup> (timetree.org) is shown. MYA, million years ago. C. Western blot of  
737 the co-immunoprecipitation of Myc-BRCA2<sup>1001-1255</sup> WT or 2A with Venus or Venus-B56 $\gamma$  from  
738 HeLa Flp-In T-REx cells in presence of 3 ng/mL MMC representative of three independent  
739 experiments. D. Western blot of the co-immunoprecipitation of BRCA2 with B56 subunits from  
740 *Xenopus* egg extracts representative of two independent experiment. E. Dissociation  
741 constants ( $K_D$ ) for the interaction between the indicated BRCA2 peptides and B56 $\alpha$  measured  
742 by isothermal titration calorimetry. F. Western blot of a pulldown of an intact or linearized DSB-  
743 containing plasmid from mock (IgG) or BRCA2 immunodepleted *Xenopus* egg extracts  
744 representative of two independent experiments.

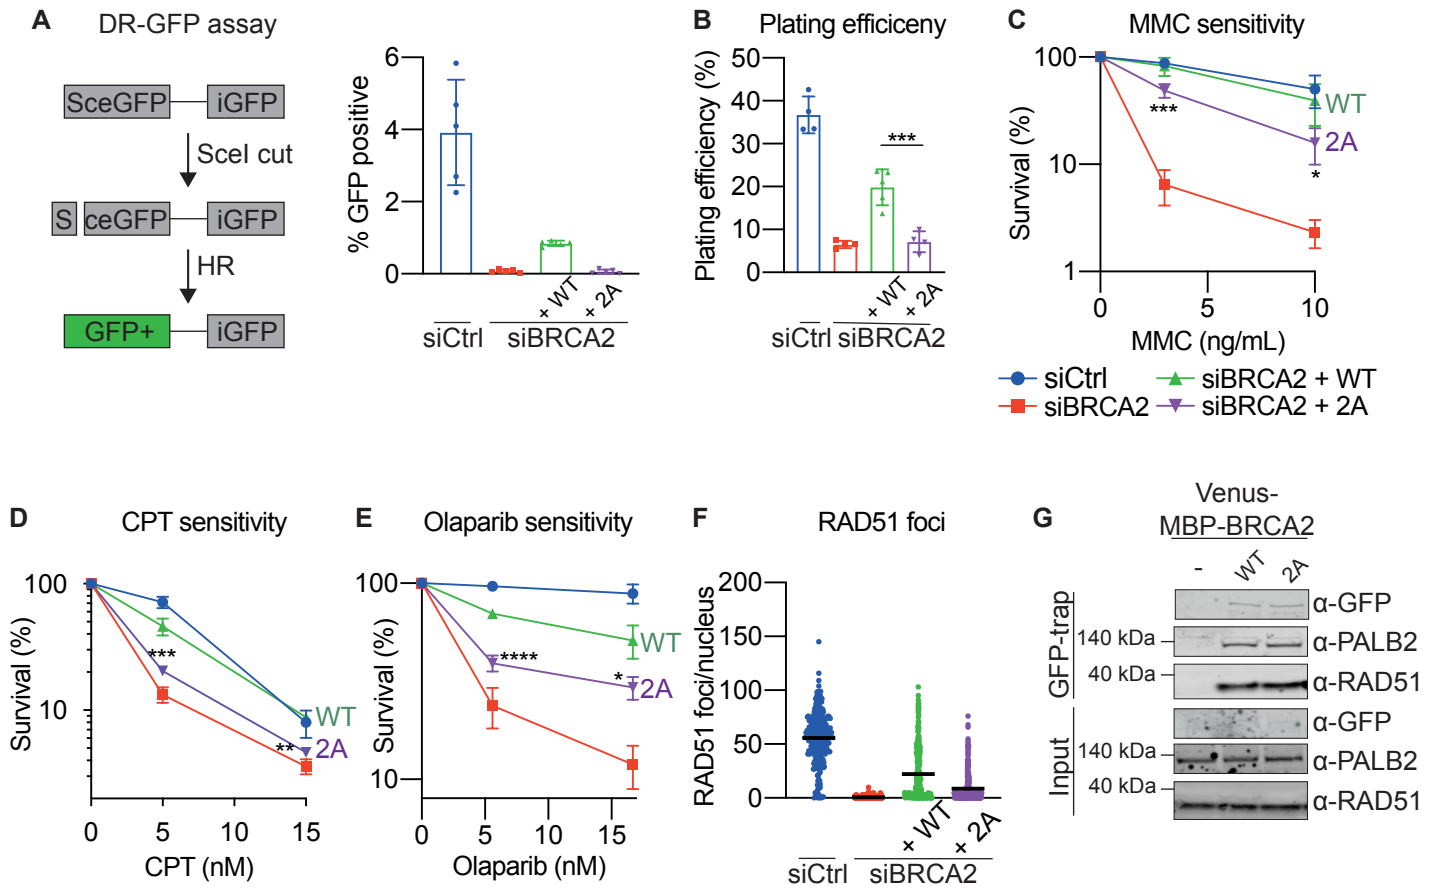

**Figure 2.**

745 **Figure 2. The BRCA2-PP2A-B56 complex is required for DNA repair by HR.**

746 A. Left: Schematic of the DR-GFP reporter assay. Right: Percentage of GFP positive (HR  
747 completed) HeLa DR-GFP Flp-In cells expressing the indicated siRNA resistant mCherry-  
748 MBP-BRCA2 cDNAs after transfection with Ctrl or BRCA2 siRNAs and an I-SceI-encoding  
749 plasmid, quantified by flow cytometry. Background values (without I-SceI) were subtracted.  
750 Error bars represent means and standard deviations. B-F: U2OS Flp-In T-REx cells stably  
751 expressing siRNA resistant WT or 2A Venus-MBP-BRCA2 cDNAs were transfected with Ctrl  
752 or BRCA2 siRNAs. B-E. Colony formation assays showing plating efficiency (B), MMC  
753 sensitivity (C), CPT sensitivity (D), and Olaparib sensitivity (E). Error bars indicate means and  
754 standard deviations. One-way ANOVA analyses with Dunnett's multiple comparison tests  
755 were performed to compare each condition to siBRCA2 + WT for a minimum of three  
756 independent experiments. \*=p<0.5, \*\*=p<0.1, \*\*\*=p<0.001, \*\*\*\*=p<0.0001. F. RAD51 nuclear  
757 foci in cells synchronized to S-phase, treated for 1 hour with MMC, and allowed to recover for  
758 8 hours before immunofluorescence microscopy. Each dot represents an individual nucleus,  
759 and means are indicated. The experiment is a representative of three independent  
760 experiments. G. Western blot of the co-purification of RAD51 and PALB2 with Venus-MBP-  
761 BRCA2 WT and 2A from U2OS Flp-In T-REx cells representative of three independent  
762 experiments.

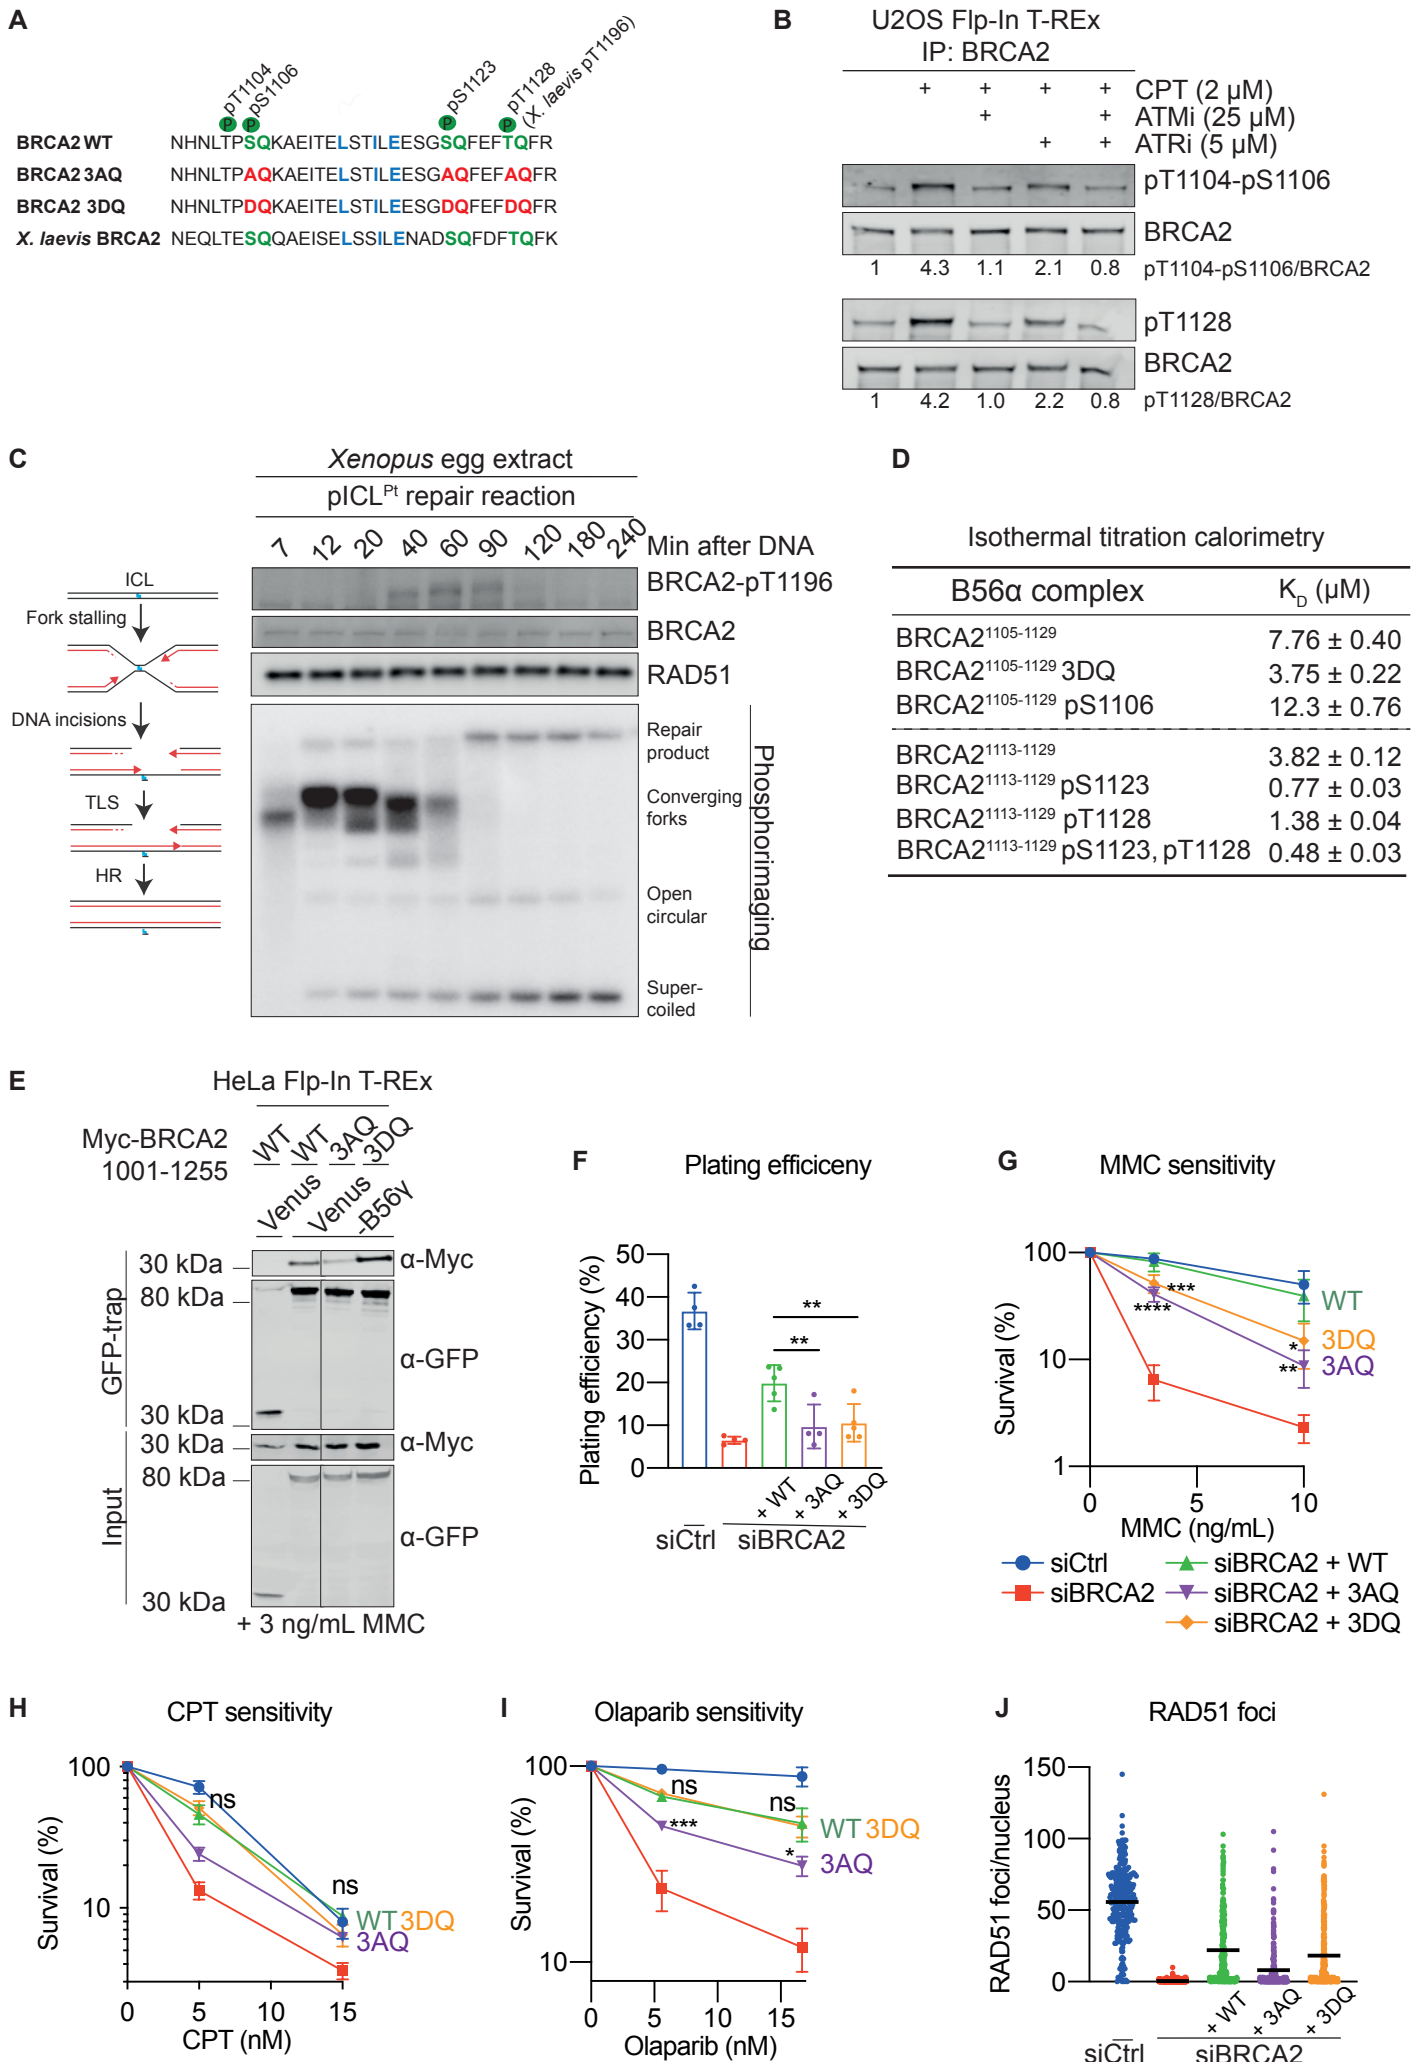

Figure 3

763 **Figure 3. PP2A-B56 binding to BRCA2 is stimulated by ATM/ATR-mediated**  
764 **phosphorylation**

765 A. Schematic of the conserved B56 binding region of human and *Xenopus laevis* BRCA2 with  
766 LxxIxE motif, relevant phosphorylation sites, and introduced mutations indicated. B. Western  
767 blots of BRCA2 immunoprecipitates from U2OS Flp-In T-Rex cells synchronized to S-phase  
768 and treated for 1 hour with 2  $\mu$ M CPT in presence or absence of ATM and ATR inhibitors  
769 representative of two independent experiments. The relative ratio of phosphorylated to total  
770 BRCA2 is indicated. C. Left: schematic of a cisplatin ICL repair reaction. Right: A replication-  
771 coupled pICL<sup>Pt</sup> repair reaction in *Xenopus* egg extracts. Top: Western blot analysis. Bottom:  
772 Analysis of a reaction run in the presence of [ $\alpha$ -<sup>32</sup>P]dCTP by agarose gel electrophoresis and  
773 visualization on a phosphoimager. Representative of two independent experiments. D.  
774 Dissociation constants ( $K_D$ ) for the interactions between the indicated BRCA2 peptides and  
775 B56 $\alpha$  measured by isothermal titration calorimetry. E. Western blot of co-immunoprecipitated  
776 Myc-BRCA2<sup>1001-1255</sup> WT, 3AQ, or 3DQ with Venus-B56 $\gamma$  from HeLa Flp-In T-Rex cells in  
777 presence of 3 ng/mL MMC representative of three independent experiments. The Myc-  
778 BRCA2<sup>1001-1255</sup> WT data (lanes 1-2) are identical to Fig. 1C. F-J. U2OS Flp-In T-REx cells  
779 stably expressing siRNA resistant WT, 3AQ, or 3DQ Venus-MBP-BRCA2 cDNAs were  
780 transfected with Ctrl or BRCA2 siRNA. The siCtrl, siBRCA2, and siBRCA2 + WT data are  
781 identical to Fig. 2B-F. F-I. Colony formation assays showing plating efficiency (F), MMC  
782 sensitivity (G), CPT sensitivity (H), and Olaparib sensitivity (I) as in Fig. 2B-E for a minimum  
783 of three independent experiments except for 3AQ in H which is n=2. Ns, non-significant. J.  
784 RAD51 nuclear foci examined as in Fig. 2F.

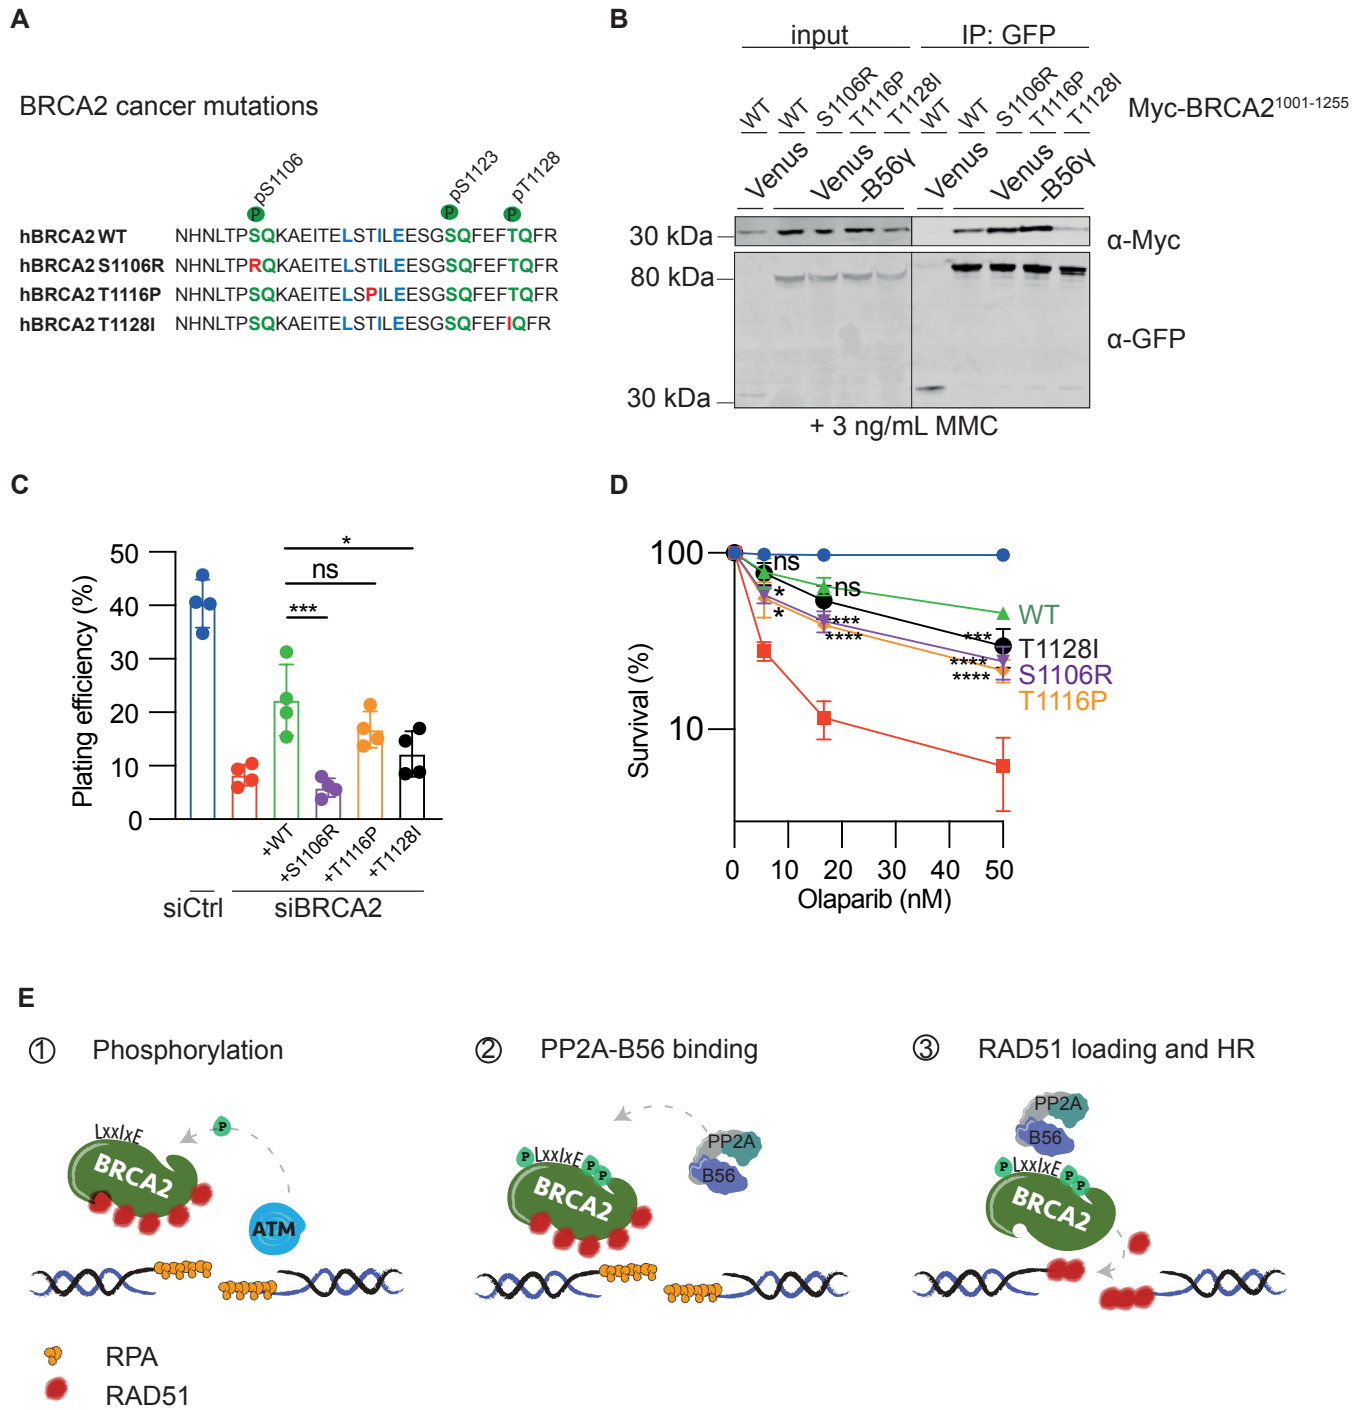

Figure 4.



785 **Figure 4. BRCA2 cancer-associated mutations deregulate PP2A-B56 binding and**  
786 **sensitize cells to PARP inhibition.**

787 A. Schematic of the B56 binding region of human BRCA2 with the introduced cancer-  
788 associated mutations indicated. B. Western blot of co-immunoprecipitated Myc-BRCA2<sup>1001-1255</sup>  
789 WT, S1106R, T1116P, or T1128I with Venus-B56 $\gamma$  from HeLa Flp-In T-Rex cells in presence  
790 of 3 ng/mL MMC representative of three independent experiments. C-D. U2OS Flp-In T-REx  
791 cells stably expressing siRNA resistant WT, S1106R, T1116P, and T1128I Venus-MBP-  
792 BRCA2 cDNAs were transfected with Ctrl or BRCA2 siRNA. Colony formation assays were  
793 performed to determine plating efficiency (C), and Olaparib sensitivity (D). Error bars indicate  
794 means and standard deviations. One-way ANOVA analyses with Dunnett's multiple  
795 comparison tests were performed to compare each condition to siBRCA2 + WT for four  
796 independent experiments. \*= $p < 0.5$ , \*\*\*= $p < 0.001$ , \*\*\*\*= $p < 0.0001$ . Ns, non-significant. E.  
797 Model. In the presence of DNA damage such as DSBs, ATM and ATR kinases phosphorylate  
798 BRCA2 on S1106, S1123, and T1128. This stimulates the binding of PP2A-B56 through a  
799 conserved LxxIxE motif, thus recruiting PP2A-B56 to the broken DNA. The phosphorylation-  
800 regulated binding of PP2A-B56 is required for the ability of BRCA2 to load RAD51 onto  
801 damaged DNA and repair DSBs via HR.

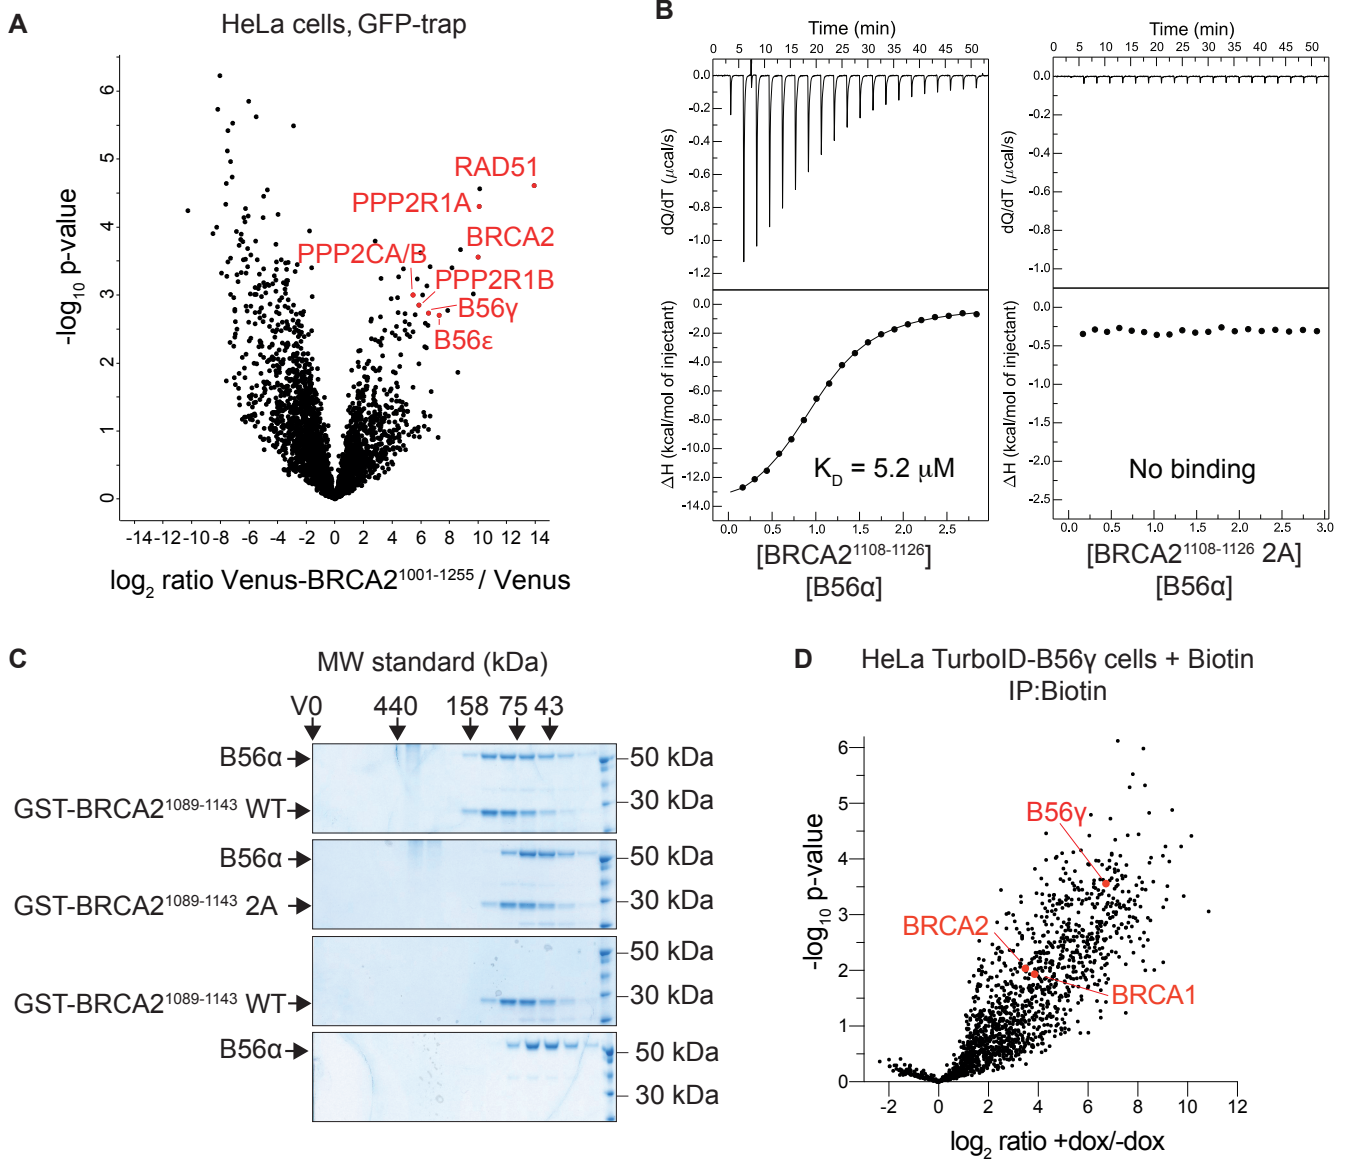

Figure S1.

802 **Figure S1. Data related to Figure 1.**

803 A. Volcano plot of proteins co-purifying with Venus-BRCA2<sup>1001-1255</sup> versus Venus in HeLa cells  
804 in presence of 100 nM CPT identified by mass spectrometry. B. Isothermal titration calorimetry  
805 binding curves for the interaction between BRCA2<sup>1108-1126</sup> WT or 2A peptides and B56 $\alpha$ . C.  
806 Colloidal stained gel showing the gel filtration chromatography of B56 $\alpha$  with GST-BRCA2<sup>1089-</sup>  
807 <sup>1143</sup> WT or 2A. D. Screen for B56 $\gamma$  proximity partners. Volcano plot of biotinylated proteins from  
808 biotin proximity labelling and mass spectrometry analysis from HeLa Flp-In T-REx cells  
809 expressing doxycycline (dox)-inducible TurboID-B56 $\gamma$  in presence of 100 nM CPT.

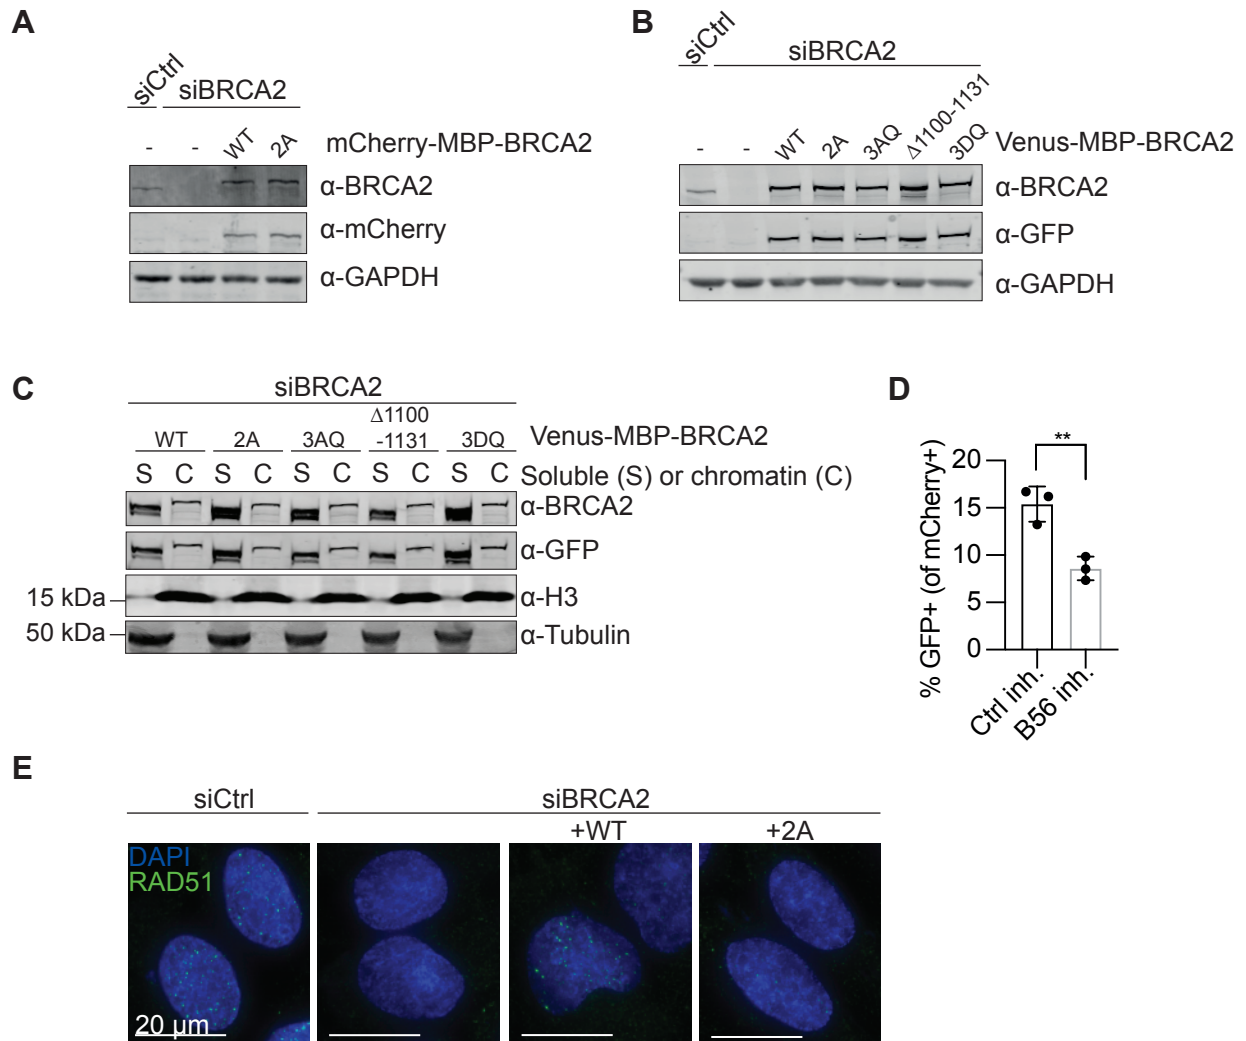

Figure S2

810 **Figure S2. Data related to Figure 2.**

811 A. Western blot of cell extracts from HeLa DR-GFP Flp-In cells stably expressing siRNA  
812 resistant mCherry-MBP-BRCA2 WT or 2A cDNA constructs after transfection with Ctrl or  
813 BRCA2 siRNA. B. Western blot of cell extracts from U2OS Flp-In T-REx cells stably  
814 expressing the indicated siRNA resistant Venus-MBP-BRCA2 constructs after transfection  
815 with Ctrl or BRCA2 siRNA. C. Western blot of fractionated chromatin from U2OS Flp-In T-REx  
816 cells stably expressing the indicated siRNA resistant Venus-MBP-BRCA2 constructs after  
817 BRCA2 siRNA transfection. D. Percentage of GFP positive (HR completed) HeLa DR-GFP  
818 Flp-In cells within the mCherry positive population of cells transfected with an SclI-encoding  
819 plasmid alongside an mCherry-tagged PP2A-B56 inhibitor or a control inhibitor. Background  
820 values (without I-SclI) were subtracted. Error bars represent means and standard deviations.  
821 Student's t-test was performed, \*\* =  $p < 0.01$ . E. Representative immunofluorescence  
822 microscopy images of RAD51 foci from Figure 2F.

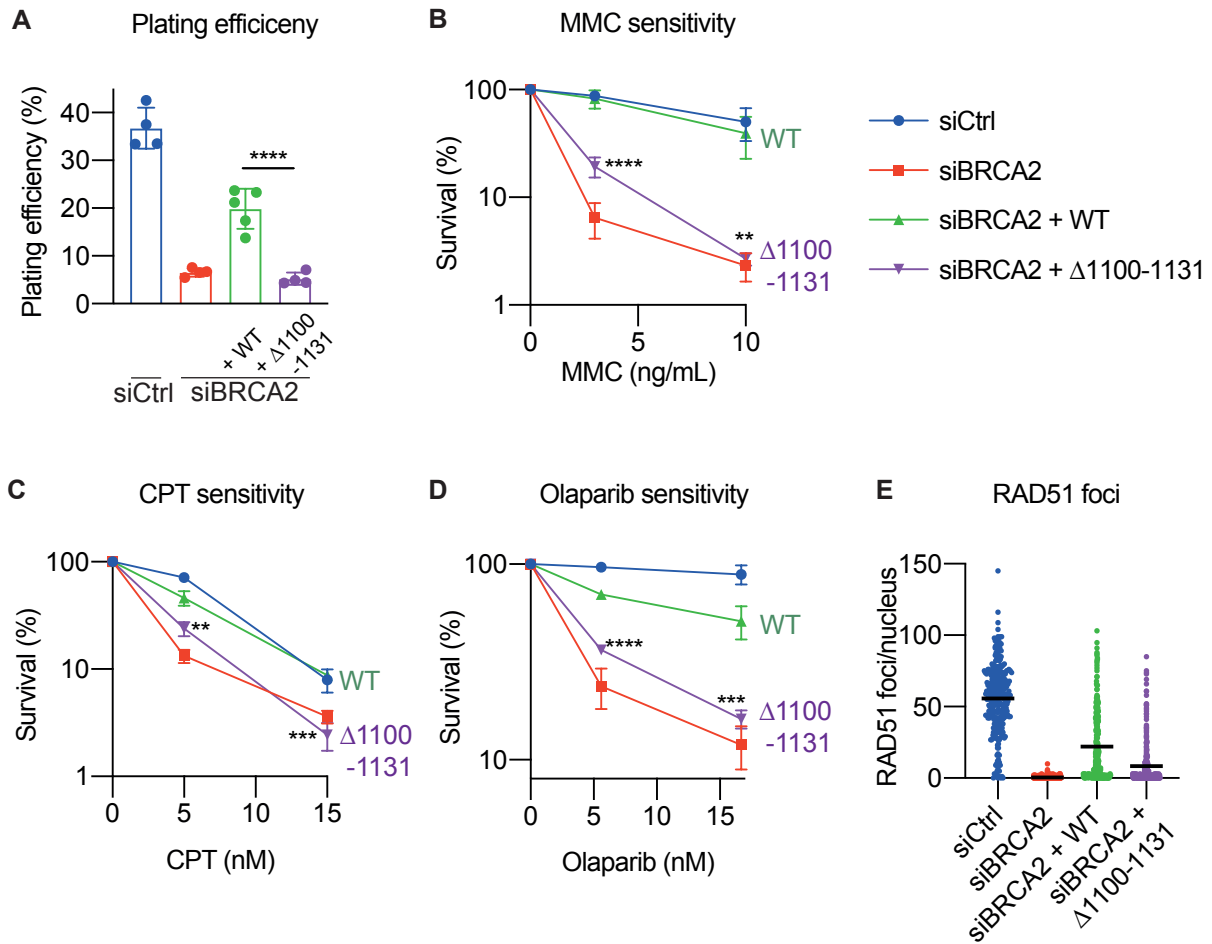

Figure S3.

823 **Figure S3. Data related to Figure 2.**

824 A-E. U2OS Flp-In T-REx cells stably expressing siRNA resistant WT or  $\Delta$ 1100-1131 Venus-  
825 MBP-BRCA2 cDNAs were transfected with Ctrl or BRCA2 siRNA. The siCtrl, siBRCA2, and  
826 siBRCA2 + WT data is identical to Fig. 2B-F. A-D. Colony formation assays showing plating  
827 efficiency (A), MMC sensitivity (B), CPT sensitivity (C), and Olaparib sensitivity (D) as in Fig.  
828 2B-E. E. MMC-induced RAD51 nuclear foci as in Fig. 2F.



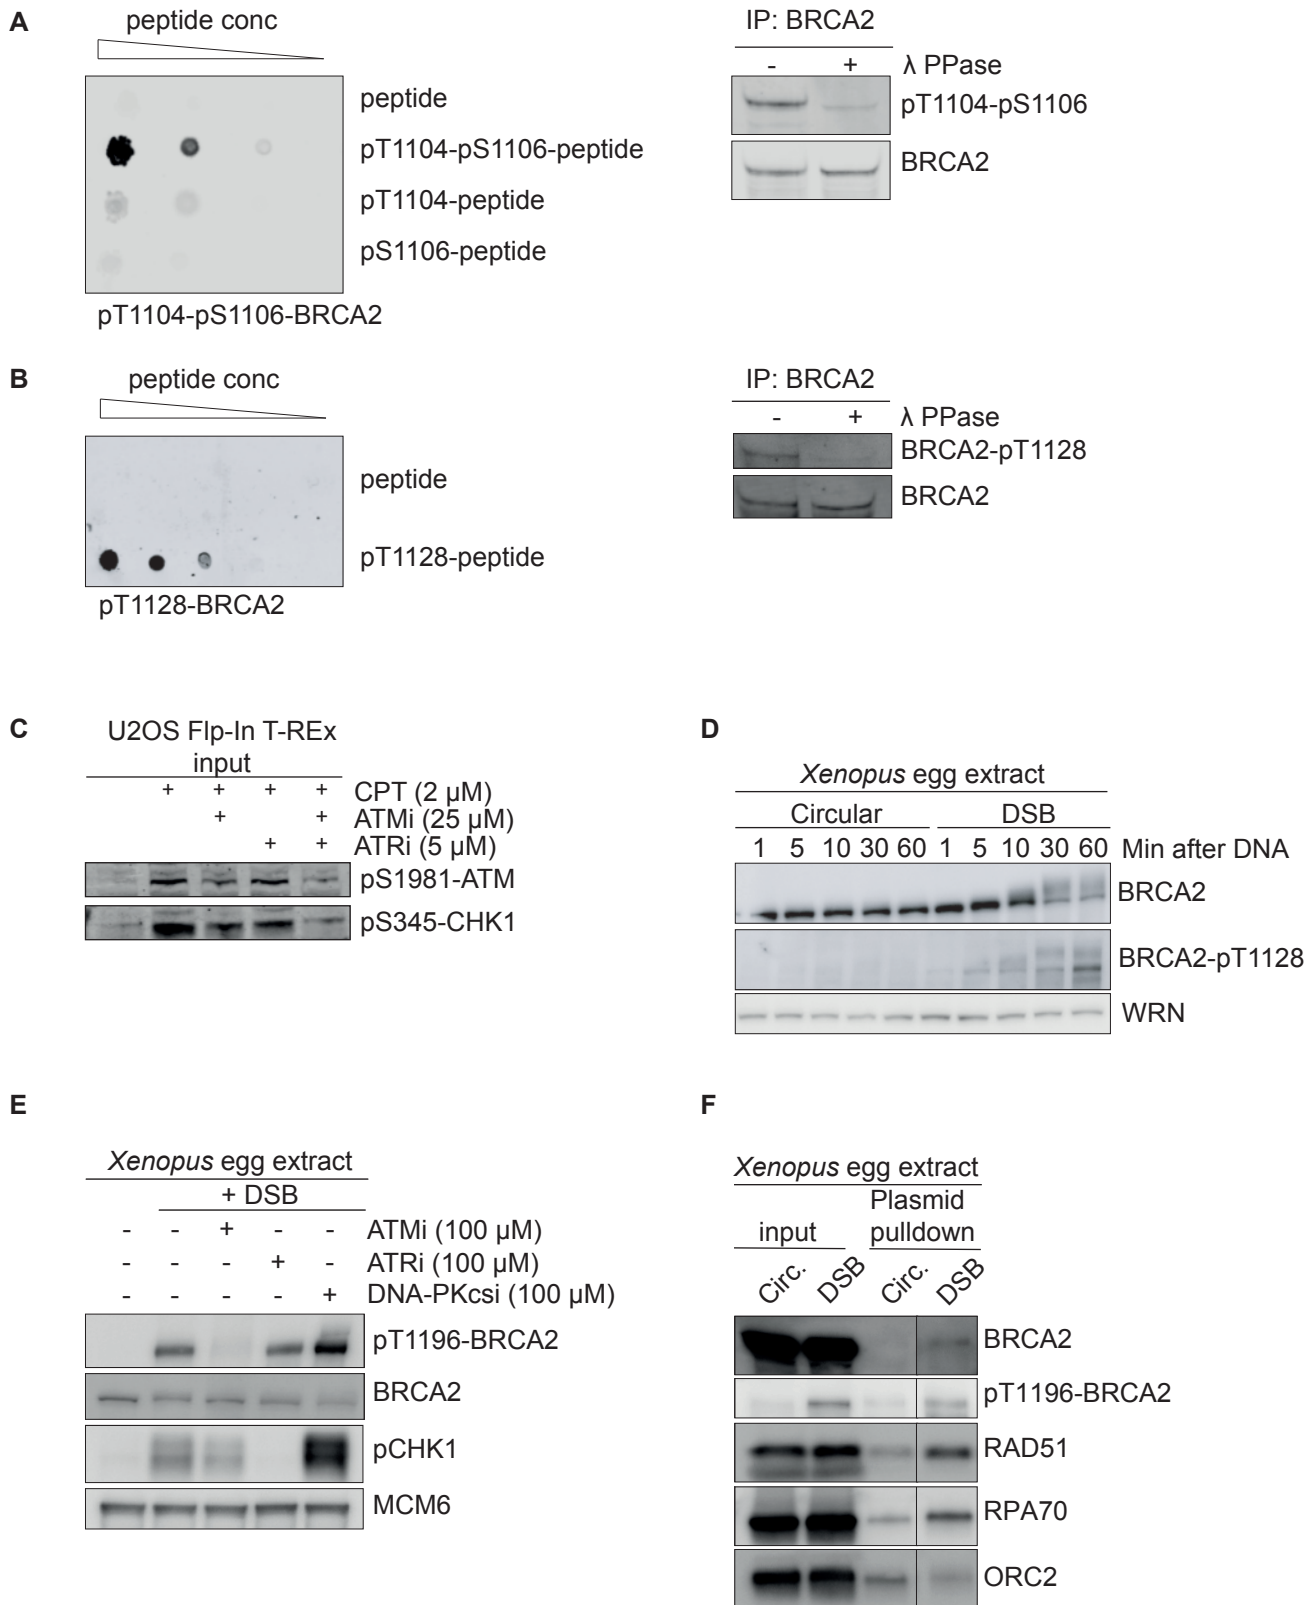

Figure S4.

829 **Figure S4. Data related to Figure 3.**

830 A. Validation of the phospho-specificity of the pT1104/pS1106-BRCA2 polyclonal antibody.  
831 Left: dot blot of non-phosphorylated and phosphorylated versions of the BRCA2 peptide  
832 SNHNL(p)TP(p)SQKAEI. Right: Western blot of lambda phosphatase treated endogenous  
833 immunoprecipitated BRCA2 from U2OS Flp-In T-REx cells synchronized to S phase and  
834 treated for 1 hour with 2  $\mu$ M CPT. B. Validation of the phospho-specificity of the pT1128-  
835 BRCA2 polyclonal antibody as in A. using the non-phosphorylated and phosphorylated  
836 BRCA2 peptide CQFEF(p)TQFRKPS for dot blotting. C. Western blot of cell extracts from  
837 U2OS Flp-In T-REx cells synchronized to S phase and treated for 1 hour with 2  $\mu$ M CPT in  
838 presence or absence of ATM and ATR inhibitors representative of two independent  
839 experiments. D. Western blot of BRCA2 in *Xenopus* egg extracts after addition of an intact  
840 circular (Circ) or linearized DSB-containing plasmid representative of two independent  
841 experiments. E. Western blot of *Xenopus* egg extracts after addition of a linearized DSB-  
842 containing plasmid in presence of ATM, ATR, or DNA-PKcs inhibitors representative of two  
843 independent experiments. F. Western blot of proteins pulled down with an intact or linearized  
844 DSB-containing plasmid from *Xenopus* egg extracts representative of three independent  
845 experiments.

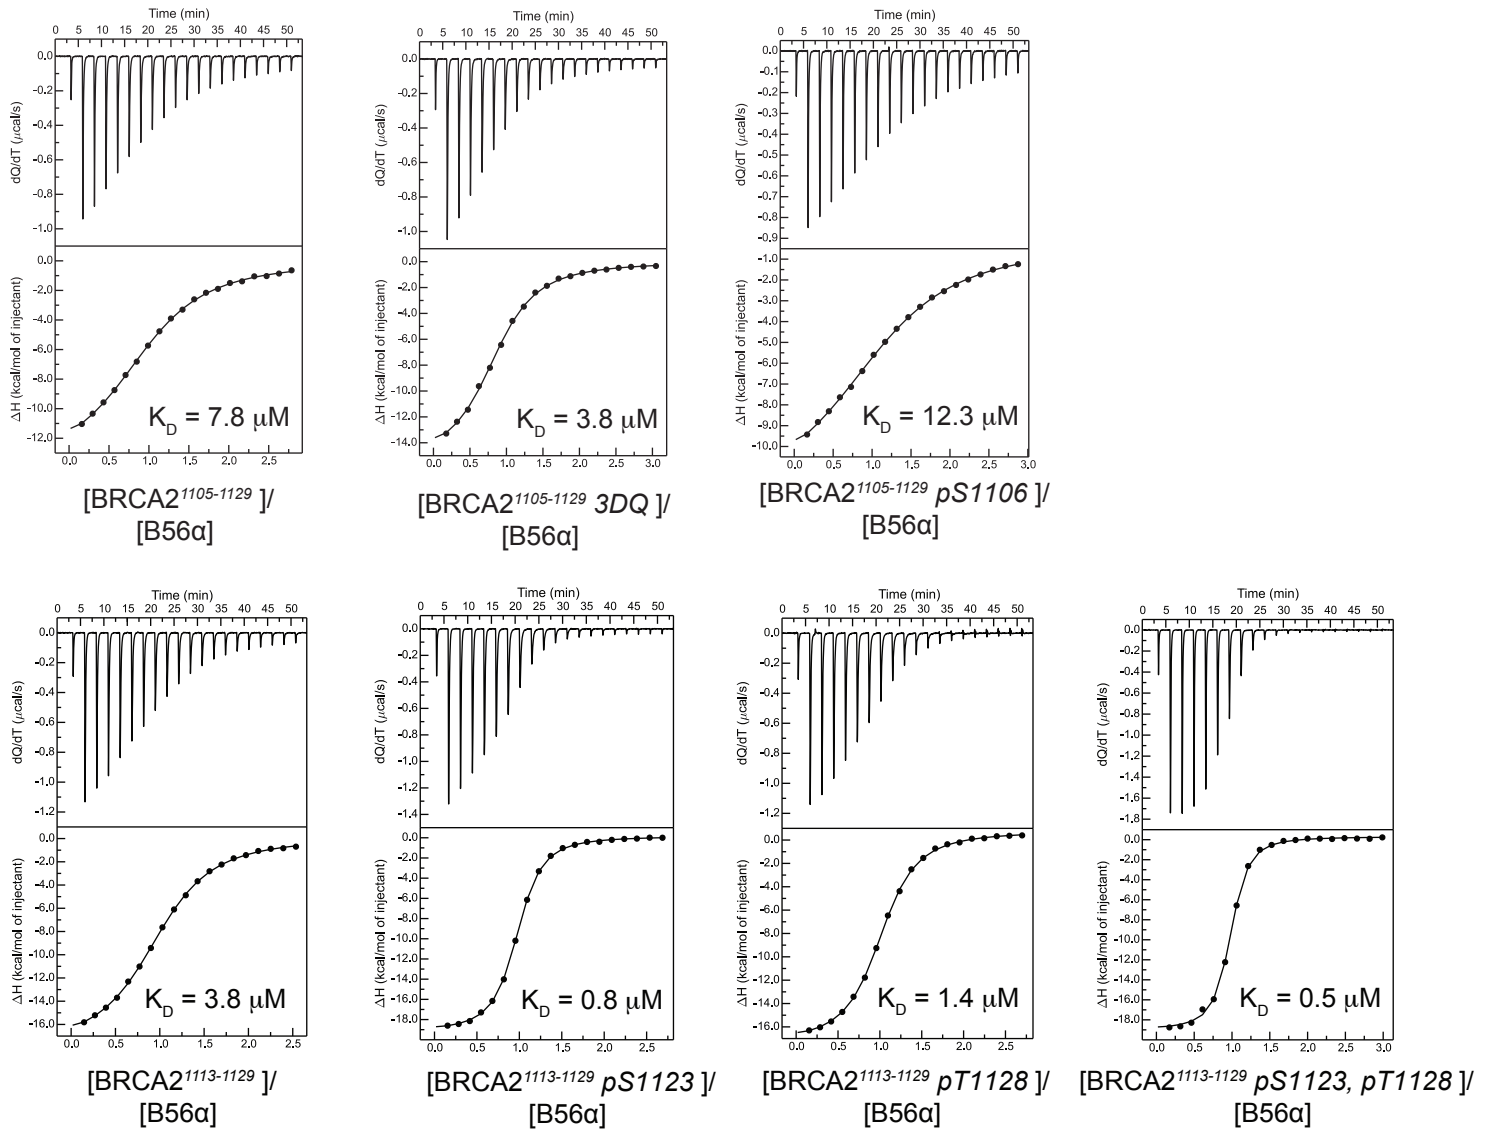

Figure S5

846 **Figure S5. Data related to Figure 3.**

847 Isothermal titration calorimetry binding curves for the interaction between the indicated BRCA2

848 peptides and B56 $\alpha$ .

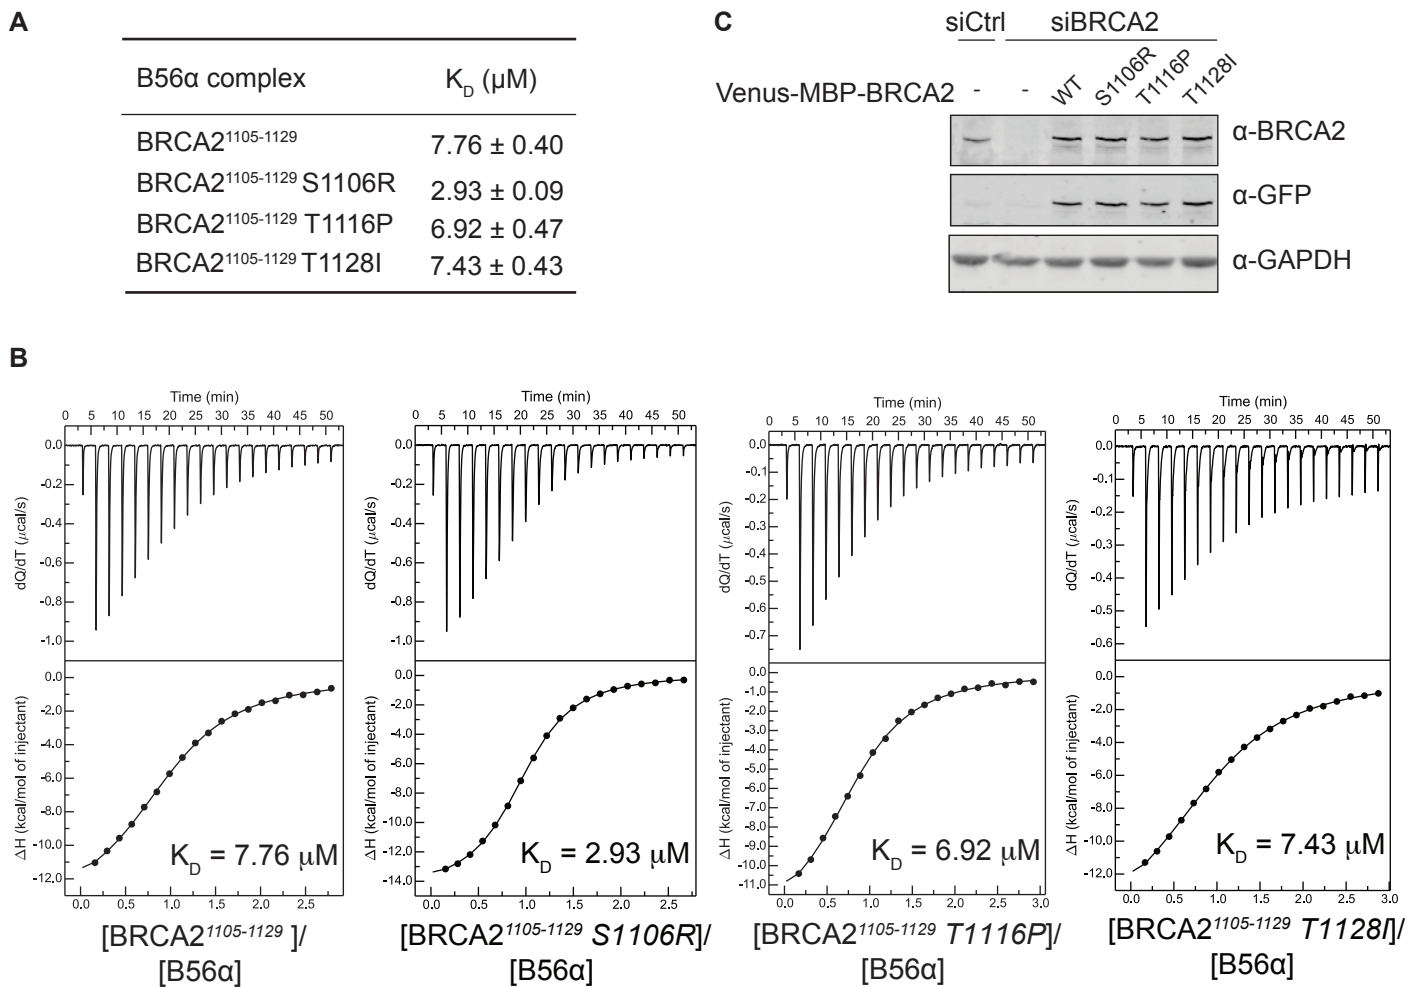

Figure S6.

849 **Figure S6. Data related to Figure 4.**

850 A-B. Dissociation constants ( $K_D$ ) (A) and binding curves (B) for the interactions between the  
851 indicated BRCA2 peptides and B56 $\alpha$  measured by isothermal titration calorimetry. The data  
852 for BRCA2<sup>1105-1129</sup> WT is identical to Fig. 3D and S5. C. Western blot of cell extracts from U2OS  
853 Flp-In T-REx cells stably expressing siRNA resistant WT, S1106R, T1116P, and T1128I  
854 Venus-MBP-BRCA2 cDNAs, which were transfected with Ctrl or BRCA2 siRNA.

855 **Table S1. Conservation of the BRCA2 B56 binding motif (available as separate file).**

856 Clustal Omega sequence alignment of 190 vertebrate BRCA2 protein sequences. The region  
857 around the B56 binding motif is shown. Related to Figure 1.

858

859 **Table S2. Mass spectrometry data (available as separate file).**

860 Mass spectrometry data of Venus-BRCA2<sup>1001-1255</sup> and Venus specific interactors in HeLa cells.  
861 Additionally, mass spectrometry data of biotinylated proteins from HeLa Flp-In T-REx TurboID-  
862 B56 $\gamma$  cells. Related to Figure 1.

863

864 **Table S3. Isothermal titration calorimetry data (available as separate file).**

865 Affinities and thermodynamic values of B56 $\alpha$ , BRCA2 peptide binding events inferred from  
866 ITC measurements performed at 25°C. Gibbs free energy ( $\Delta G$ ), enthalpy ( $\Delta H$ ), entropy (-  
867  $T\Delta S$ ), equilibrium dissociation constant ( $K_D$ ) and reaction stoichiometry ( $n$ ) are shown. The  
868 affinity is defined by the Gibbs energy for binding  $\Delta G = -RT \ln K_A = RT \ln K_D$ . Related to Figure  
869 1, 3, and 4.



870 **Table S4. DNA oligos.**

871 DNA oligos used in this study. QC: Quick change, F: Forward, R: Reverse.

| <b>Primer</b>                                          | <b>Sequence (5'-3')</b>                                                     |
|--------------------------------------------------------|-----------------------------------------------------------------------------|
| QC R for resistance to s2084 and s2085                 | GGAGAAGACATCATCTGGCCTGTATATCTTTTCGCAATGAAAGAG                               |
| QC F for resistance to s2084 and s2085                 | CTCTTTCATTGCGAAAGATATACAGGCCAGATGATGTCTTCTCC                                |
| QC R to introduce L1114A-I1117A                        | CCTGATTCTTCTAATGCAGTAGAAGCTTCTGTAATTTCTGC                                   |
| QC F to introduce L1114A-I1117A                        | GCAGAAATTACAGAAGCTTCTACTGCATTAGAAGAATCAGG                                   |
| QC R to introduce S1106A                               | CTGCCTTTTGGGCAGGTGTTAAATTATGG                                               |
| QC F to introduce S1106A                               | CCATAATTTAACACCTGCCAAAAGGCAG                                                |
| QC R to introduce S1123A                               | GCAAATTCAACTGAGCTCCTGATTCTTC                                                |
| QC F to introduce S1123A                               | GAAGAATCAGGAGCTCAGTTTGAATTTGC                                               |
| QC R to introduce T1128A                               | GCTTTCTAACTGAGCAAATTCAACTG                                                  |
| QC F to introduce T1128A                               | CAGTTTGAATTTGCTCAGTTTAGAAAGC                                                |
| F BRCA2 (to introduce $\Delta$ 1100-113, 2 step)       | CCCGGGGTACCCACCATGCCTATTGGATCCAAAGAGAGG                                     |
| R BRCA2 1099 (to introduce $\Delta$ 1100-1131, 2 step) | TATGTAGCTTGGCTTTGAATTAATCCTGCTTGG                                           |
| F BRCA2 1132 (to introduce $\Delta$ 1100-113, 2 step)  | CAGGATTTAATTCAAAGCCAAGCTACATATTGC                                           |
| R BRCA2 (to introduce $\Delta$ 1100-113, 2 step)       | CCCGGGGCGGCCGCCGATATATTTTTTAGTTGTAATTGTGTCC                                 |
| QC R to introduce S1106D                               | CTGCCTTTTGGTCAGGTGTTAAATTATGG                                               |
| QC F to introduce S1106D                               | CCATAATTTAACACCTGACCAAAGGCAG                                                |
| QC R to introduce S1123D                               | GAGTAAATTCAACTGATCTCCTGATTCTTC                                              |
| QC F to introduce S1123D                               | GAAGAATCAGGAGATCAGTTTGAATTTACTC                                             |
| QC R to introduce T1128D                               | GCTTTCTAACTGATCAAATTCAACTG                                                  |
| QC F to introduce T1128D                               | CAGTTTGAATTTGATCAGTTTAGAAAGC                                                |
| QC R to introduce S1106R                               | CAAACCATAATTTAACACCTAGGCAAAGGCAGAAATTACAGAAC                                |
| QC F to introduce S1106R                               | GTTCTGTAATTTCTGCCTTTTGCCTAGGTGTTAAATTATGGTTTG                               |
| QC R to introduce T1116P                               | AGGCAGAAATTACAGAACTTTCTCCTATATTAGAAGAATCAGGAAGT                             |
| QC F to introduce T1116P                               | ACTTCTGATTCTTCTAATATAGGAGAAAGTTCTGTAATTTCTGCCT                              |
| QC R to introduce T1128I                               | AGAATCAGGAAGTCAGTTTGAATTTATTAGTTTAGAAAGCCAAGC                               |
| QC F to introduce T1128I                               | GCTTGGCTTTCTAACTGAATAAATTCAACTGACTTCTGATTCT                                 |
| R to create BamHI-Myc-BRCA2 <sup>1001-1255</sup> -NotI | CCCGGGGCGGCCGCTCATACTCTGCAGAAGTTTCC                                         |
| F to create BamHI-Myc-BRCA2 <sup>1001-1255</sup> -NotI | CCCGGGGGATCCCCACCATGGAACAAAAGTTGATCAGCGA<br>GGAGGACCTGTCAAATCACAGTT TTGGAGG |
| R to create BamHI-BRCA2 <sup>1001-1255</sup> -NotI     | CGATGCGGCCGCTTATTCCTCACTAATATTCTC                                           |
| F to create BamHI-BRCA2 <sup>1001-1255</sup> -NotI     | CGATGGATCCATCTCCTTGAATATAGAT                                                |

872
